## **Deletion of immune evasion genes provides an effective vaccine design for tumor-associated herpesviruses**

**Gurpreet Brar<sup>1\*</sup>, Nisar A. Farhat<sup>1\*</sup>, Alisa Sukhina<sup>1</sup>, Alex K. Lam<sup>1</sup>, Yong Hoon Kim<sup>1</sup>, Tiffany Hsu<sup>1</sup>, Leming Tong<sup>1</sup>, Wai Wai Lin<sup>2</sup>, Carl F. Ware<sup>2</sup>, Marcia A. Blackman<sup>3</sup>, Ren Sun<sup>1</sup> & Ting-Ting Wu<sup>1</sup>**

\*These authors contributed equally to this work.

<sup>1</sup>Department of Molecular and Medical Pharmacology, University of California, Los Angeles, CA 90095, USA

<sup>2</sup>Laboratory of Molecular Immunology, Infectious and Inflammatory Diseases Center, Sanford Burnham Prebys Medical Discovery Institute, 10901 North Torrey Pines Road, La Jolla, CA 92037, USA

<sup>3</sup>Trudeau Institute, Saranac Lake, New York, 12983

Corresponding author:

Ting-Ting Wu

TWu@mednet.ucla.edu

1 **Abstract**

2 Vaccines based on live attenuated viruses often induce broad, multifaceted immune  
3 responses. However, they also usually sacrifice immunogenicity for attenuation. It is  
4 particularly difficult to elicit an effective vaccine for herpesviruses due to an armament of  
5 immune evasion genes and a latent phase. Here, to overcome the limitation of  
6 attenuation, we developed a rational herpesvirus vaccine in which viral immune evasion  
7 genes were deleted to enhance immunogenicity while also attaining safety. To test this  
8 vaccine strategy, we utilized murine gammaherpesvirus-68 (MHV-68) as a proof-of-  
9 concept model for the cancer-associated human  $\gamma$ -herpesviruses, Epstein-Barr virus and  
10 Kaposi sarcoma-associated herpesvirus. We engineered a recombinant MHV-68 virus by  
11 targeted inactivation of viral antagonists of type I interferon (IFN-I) pathway and deletion  
12 of the latency locus responsible for persistent infection. This recombinant virus is highly  
13 attenuated with no measurable capacity for replication, latency, or persistence in  
14 immunocompetent hosts. It stimulates robust innate immunity, differentiates virus-specific  
15 memory T cells, and elicits neutralizing antibodies. A single vaccination affords durable  
16 protection that blocks the establishment of latency following challenge with the wild type  
17 MHV-68 for at least six months post-vaccination. These results provide a novel approach  
18 to effective vaccination against cancer-associated herpesviruses through the elimination  
19 of latency and key immune evasion mechanisms from the pathogen.

20

21 **Keywords:** attenuation,  $\gamma$ -herpesviruses, immunogenicity, immune evasion, latency, T-  
22 cell, tumorigenesis, type I interferon, vaccine

## 23 **Introduction**

24 Human  $\gamma$ -herpesviruses Epstein-Barr virus (EBV) and Kaposi sarcoma-associated  
25 herpesvirus (KSHV) are associated with cancer, and with no effective vaccine remain a  
26 global health challenge. Despite strong innate and adaptive immune responses, once  
27 acquired, herpesviruses persist for the rest of the host's life. EBV is associated with  
28 Burkitt's lymphoma, nasopharyngeal carcinoma (NPC), and Hodgkin's- and non-  
29 Hodgkin's lymphomas<sup>1-3</sup> while KSHV is associated with Kaposi's sarcoma (KS), primary  
30 effusion lymphoma (PEL), and multicentric Castleman's disease (MCD). These  
31 malignancies frequently develop in AIDS patients<sup>4-6</sup>, but also in immunocompetent  
32 people with more than 160,000 annual cancer cases associated with EBV and KSHV<sup>7</sup>.  
33 Clearly, effective vaccines against human  $\gamma$ -herpesviruses would dramatically reduce the  
34 incidence of malignancies associated with these viruses.

35

36 Herpesviruses establish persistent infections characterized by lytic replication and  
37 latency. Lytic replication of  $\alpha$ - and  $\beta$ -herpesviruses results in disease pathologies, such  
38 as varicella and herpes zoster for Varicella-Zoster virus (VZV), cold sores and genital  
39 lesions for herpes simplex virus (HSV), and congenital defects for cytomegalovirus  
40 (CMV). In comparison, malignancies associated with  $\gamma$ -herpesvirus infection are linked to  
41 viral latency. Viral genes expressed during latency promote the survival and proliferation  
42 of infected cells with increased susceptibility to carcinogenic transformation. Therefore,  
43 effective vaccine strategies against tumor-associated herpesviruses ideally should  
44 prevent latent infections. The oncogenic potential of  $\gamma$ -herpesviruses has focused vaccine  
45 research and development on protein subunit vaccines without the latency risk of live

46 viruses. Subunit anti-EBV vaccines have been based on the envelope protein gp350.  
47 Antibodies against gp350 block EBV infection in B-cells<sup>8</sup> which are long-term latency  
48 reservoirs. Gp350-based vaccines protect against infectious mononucleosis (IM);  
49 however, they do not influence the overall infection rate<sup>9</sup> and thus are unlikely to prevent  
50 EBV-associated cancers. Similarly, subunit vaccines against HSV-2 may reduce genital  
51 lesions but do not prevent infection<sup>10</sup>. Therefore, a new strategy is required to establish  
52 wide, durable immunity against herpesviruses.

53  
54 Live viral vaccines simulate an infection presenting the entire viral antigen repertoire to  
55 create stable, long lasting immune memory. Viruses can be attenuated by removing viral  
56 genes essential for replication. However, replication-deficient viruses may undergo  
57 recombination and regain replication capacity during propagation in complementing cells  
58 expressing the missing genes. Furthermore, attenuation of replication competence may  
59 compromise immunogenicity. An alternative approach is to selectively inactivate viral  
60 genes involved in immune evasion in order to attenuate replication and enhance  
61 immunogenicity. Viral antagonists of type I interferon (IFN-I) response are an important  
62 class of immune evasion genes to consider. The IFN-I response is the first line of antiviral  
63 defense in the host, and subverting the IFN-I response is critical for viruses to establish  
64 infections in hosts. IFN-I response initiates a signaling cascade inducing the transcription  
65 of over 300 genes that counteract viral infections<sup>11-14</sup> and also promotes adaptive immune  
66 responses. Approximately 25% of genes encoded by  $\gamma$ -herpesviruses modulate host  
67 immunity, including those that counteract the IFN-I response<sup>15,16</sup>.

68

69 Here, we designed a viral vaccine that addresses both immunogenicity and safety. We  
70 hypothesized that a recombinant herpesvirus lacking multiple IFN-I evasion genes and  
71 deficient in latency can prime memory development in T and B cells despite attenuated  
72 replication. However, human  $\gamma$ -herpesviruses are highly species-specific and cannot  
73 infect small animals. To overcome this limitation, we utilized murine gammaherpesvirus  
74 68 (MHV-68), closely related to EBV and KSHV<sup>17</sup>, to test the hypothesis. We show that  
75 an MHV-68 virus engineered to be latency- and immune evasion-deficient is highly  
76 attenuated in immunocompetent hosts yet a potent inducer of antiviral immunity.  
77 Moreover, this recombinant virus elicits robust long-lasting protection against persistent  
78 wild type viral infection.

79 **Results**

80 ***Construction of a virus deficient in immune evasion and persistence (DIP)***

81 In our previous genome-wide screen of MHV-68 open reading frames (ORFs), eight were  
82 found to reduce IFN-I responses according to an IFN-stimulated response element (ISRE)  
83 reporter assay<sup>18</sup>. We selected *ORF10*, *ORF36*, and *ORF54* for the insertion of  
84 translational stop codons as these genes are dispensable for viral replication and are  
85 conserved among MHV-68, KSHV, and EBV. We also inactivated K3, a viral inhibitor of  
86 MHC class I antigen presentation pathway, by truncation to increase the immunogenicity  
87 of the vaccine virus<sup>19,20</sup>. We hypothesized that removal of these four immune evasion  
88 genes would increase immunogenicity while attenuating replication of the vaccine virus  
89 by inducing a robust IFN response and presenting all viral epitopes.

90

91 A critical safety component of our design is eliminating the latency of the vaccine virus.  
92 In KSHV and MHV-68, the biphasic life cycle is regulated by RTA, the replication and  
93 transcription activator, and by LANA, the latency associated nuclear antigen. The latter is  
94 required for latency establishment<sup>21–23</sup> while the former upregulates lytic genes<sup>24–26</sup>. We  
95 previously showed that abolishing LANA expression combined with constitutive RTA  
96 expression results in a latency-deficient virus<sup>27</sup>. Here, we replaced the latency locus  
97 comprising ORF72, ORF73 (LANA), ORF74, and M11 with constitutively expressed RTA  
98 driven by the phosphoglycerate kinase 1 (PGK) promoter in a two-tiered approach to  
99 prevent persistent infection. Deletion of the latency locus, constitutive RTA expression,  
100 and the removal of immune evasion genes created a live attenuated  $\gamma$ -herpesvirus  
101 vaccine named DIP (deficient in immune evasion and persistence) (Fig. 1A).

102

103 ***DIP replication is attenuated in vitro***

104 Comparison of the *in vitro* growth kinetics of DIP in NIH3T3 fibroblasts with the wild type  
105 (WT) virus showed that DIP replication was significantly attenuated. After infection at MOI  
106 of 0.01, DIP yielded 300-fold and 40-fold less viral production than WT at 48 h and 72 h  
107 post-infection, respectively (Fig. 1B). Pretreatment with IFN- $\beta$  inhibited replication of WT  
108 by 10-fold and DIP by 100-fold (Fig. 1C). This larger decrease in infectious DIP virion  
109 production confirmed augmented susceptibility to the IFN-I response in the absence of  
110 viral IFN evasion genes.

111

112 ***DIP produces no infectious virions in vivo***

113 We hypothesized that removal of the viral IFN-I evasion genes would generate a highly  
114 attenuated vaccine *in vivo*. To test this, we infected C57Bl/6 mice intraperitoneally and  
115 harvested their spleens 3 d after infection. While the WT virus produced 88 PFU/spleen,  
116 no infectious virus was detected in the spleens of DIP-inoculated mice (Fig. 2A). We also  
117 harvested spleens at later times post-infection and assessed spontaneously reactivating  
118 virus by the infectious center assay and quantified latent viral genomes by qPCR. Viral  
119 reactivation or latent virus was undetectable in the spleens of DIP-infected mice at 14 d  
120 (Figs. 2B and 2C) and at 2 mo (Figs. 2E and 2F) after infection. Furthermore, no infectious  
121 virion production in the lungs or latency establishment was observed in the spleens after  
122 intranasal inoculation (Figs. S1A-D).

123

124 Latency establishment is associated with the expansion of V $\beta$ 4-specific T-cells and  
125 splenomegaly<sup>28-30</sup>. At 14 d post-infection, the spleens of WT-infected mice increased to  
126 0.22 g on average while those of DIP-infected mice weighed 0.10 g (Fig. 2D), similar to  
127 uninfected mice. At 2 mo post-infection, WT-infected mice still had significantly enlarged  
128 spleens compared to those of DIP-inoculated mice (Fig. 2G).

129

130 To determine whether the IFN-I response contributed to the attenuation of the DIP virus,  
131 we injected 10<sup>5</sup> PFU of DIP intraperitoneally into the interferon- $\alpha/\beta$  receptor-deficient  
132 (IFNAR $\alpha/\beta^{-/-}$ ) mice. DIP replication was rescued and 4 x 10<sup>5</sup> infectious virions were  
133 detected in the spleens at 3d post-infection (Fig. 2H). Infectious virions were also detected  
134 in the livers and lungs but not the brains of IFNAR1<sup>-/-</sup> mice. In contrast, no detectable  
135 infectious virions were recovered from severe combined immune deficiency (SCID) mice.  
136 Comprehensive analyses of the spleens, livers, brains, and lungs showed no evidence of  
137 infectious virions in either C57BL/6 or SCID mice, both of which have intact IFN-I  
138 responses (Fig. 2H).

139

#### 140 ***DIP immunization prevents latent infection***

141  $\gamma$ -herpesvirus associated malignancies are linked to latency<sup>31,32</sup>. Therefore, the goal of  
142 vaccination against  $\gamma$ -herpesviruses is to prevent latency establishment. We assessed  
143 the level of protection conferred by DIP immunization against latent infection by WT  
144 challenge. Mice were intraperitoneally injected with 1 x 10<sup>5</sup> PFU DIP then intranasally  
145 challenged 1 mo later with 5,000 PFU WT. Mock immunized mice presented an average  
146 of 6 x 10<sup>2</sup> infectious centers per 2 x 10<sup>7</sup> splenocytes whereas no viral reactivation was



147 detected in six of seven DIP-immunized mice 14 d after challenge (Fig. 3A). Analysis of  
148 viral copy number confirmed that DIP immunization provided protection against splenic  
149 latent infection (Fig. 3B). At 1 mo post-challenge, five of six (83.3%) DIP-vaccinated mice  
150 were completely protected from latent infection (Fig. 3C). The remaining DIP-vaccinated  
151 mouse had a 100-fold reduction in latently infected cells compared to mock immunized  
152 mice. We also challenged the immunized mice 6 mo after a single vaccination and  
153 measured viral latency at 28 d post-challenge. All six DIP-immunized mice were  
154 completely protected against latent infection by a WT virus challenge (Fig. 3D).

155

#### 156 ***DIP primes virus-specific T cells that limit WT infection***

157 We hypothesized that the DIP vaccine elicited a robust and functional T cell response  
158 accounting for the long-lasting protection against WT challenge. We quantified virus-  
159 specific CD8<sup>+</sup> T-cells using tetramers for the MHV-68 epitopes, ORF6<sub>487-495</sub> and  
160 ORF61<sub>524-531</sub>. At 1 mo post-infection, WT and DIP induced similar frequencies of specific  
161 T-cells to ORF6 and ORF61 (Figs. S2A & S2B). At 2 mo post-infection, the frequency of  
162 ORF6-specific T cells increased two-fold in DIP compared to WT while the frequency of  
163 ORF61-specific T-cells were similar (Figs. 4A & 4B). The effector/memory subtypes of  
164 these virus-specific T cells were examined by the expression levels of IL7R $\alpha$  (CD127)  
165 and killer cell lectin-like receptor (KLRG1) (Fig. S2D). The CD127<sup>high</sup>KLRG1<sup>low</sup> subset are  
166 memory precursors effector cells (MPECs), which develop into long-lived memory cells,  
167 whereas the CD127<sup>low</sup>KLRG1<sup>high</sup> subset, referred to as short-lived effector T cells  
168 (SLECs), are terminally differentiated<sup>33</sup>. We observed that DIP promoted the generation  
169 of CD8<sup>+</sup> MPECs. Significantly more ORF6-specific CD8<sup>+</sup> T cells (54%) primed by DIP

170 differentiated into MPECs compared to those primed by WT (33%). However, no  
171 difference was found between WT and DIP infection in terms of ORF61-specific T cells  
172 (Figs. 4C and S2C).

173

174 We assessed the functions of these virus-specific T-cells by examining their abilities to  
175 produce IFN- $\gamma$ , TNF- $\alpha$ , and IL-2. Consistent with the tetramer-staining results, cells  
176 producing IFN- $\gamma$ , TNF- $\alpha$ , or IL-2 upon stimulation of the ORF6 peptide were twice as  
177 frequent in DIP-infected mice as in WT-infected mice (Figs. 4D, 4F, & 4H). Cells producing  
178 IFN- $\gamma$  upon stimulation of the ORF61 peptide were at similar frequencies between WT  
179 and DIP infection. However, a lower frequency of cells primed by DIP produced TNF- $\alpha$  in  
180 response to the ORF61 peptide compared to those primed by WT (Figs. 4E & 4F). The  
181 ORF61 peptide did not stimulate any cells from either WT or DIP-infected mice to produce  
182 IL-2 (Fig. 4I). Therefore, despite its limited and transient antigen expression due to highly  
183 attenuated replication, DIP still induces robust and functional T-cell responses.

184

185 To determine whether DIP-primed T-cells confer protection against WT challenge, we  
186 harvested CD4<sup>+</sup>, CD8<sup>+</sup> or total T-cells from mice infected 2 mo earlier with WT or DIP and  
187 transferred  $3 \times 10^6$  cells into naïve mice. These recipient mice were challenged with 5000  
188 PFU WT 1 d after transfer. No significant difference was observed between WT- and DIP-  
189 primed T cells in terms of donor cell expansion (Fig. S3). At 14d post-challenge, CD4<sup>+</sup> T-  
190 cell transfer had minimal impact on the number of latently infected cells (Fig. 5A) despite  
191 evidence that CD4<sup>+</sup> T cells are cytotoxic to herpesviruses<sup>34–36</sup>. The transfer of WT-primed  
192 CD8<sup>+</sup> T-cells caused a five-fold reduction in reactivated latently infected cells. In contrast,

193 CD8+ T-cells primed by DIP failed to affect the latently infected cell pool (Fig. 5B).  
194 However, naïve mice receiving DIP-primed total T-cells had a 30-fold reduction in the  
195 number of reactivated latently infected cells, whereas transferring of WT-primed total T  
196 cells caused a 20-fold reduction (Fig. 5C). The results indicate that virus-specific CD4+  
197 and CD8+ T-cells act cooperatively to confer protection. Despite severe attenuation, DIP  
198 vaccination elicited robust cellular immunity that inhibits the establishment of latency by  
199 the challenge virus.

200

### 201 ***Optimal DIP-mediated protection requires both antibodies and T cells***

202 To determine whether DIP-elicited antibodies complemented the T-cell-mediated  
203 protection, serum and total T-cell from DIP-infected mice were transferred to naïve mice.  
204 This combination completely protected four of six mice against a 5000 PFU WT challenge  
205 (Fig. 6A). The two unprotected mice had a significantly reduced number of reactivating  
206 latently infected cells compared to the control. We examined the protective capacity of  
207 antibodies by passively transferring DIP-immune serum to naïve mice. No significant  
208 difference in protection was observed between those receiving DIP-immune serum and  
209 those receiving serum from mock infected mice (Fig. 6B). Neutralizing activity in DIP-  
210 immune serum was less than that in WT-immune serum at 2 mo post-infection (Fig. 6D)  
211 despite relatively higher levels of virus-specific IgG in the serum DIP-infected mice (Fig.  
212 6C). These results indicate that DIP-elicited humoral immunity collaborates with cellular  
213 immunity to provide optimal protection.

214

### 215 ***DIP vaccine elicits robust inflammatory responses***

216 Despite its limited replication, DIP primed robust virus-specific immune responses and  
217 conferred durable protection. Activation of innate immune response is essential for the  
218 development of adaptive immunity<sup>54-56</sup>. WT MHV-68 avoids inducing inflammatory  
219 cytokines in order to evade the immune system. *In vitro*, a high MOI (100 PFU/cell) was  
220 required to elicit a measurable cytokine response in bone marrow-derived macrophages  
221 (BMDM) and dendritic cells<sup>37</sup>. We investigated whether DIP induces inflammatory  
222 cytokines. BMDMs were infected with WT and DIP at MOI of 1 and cytokine RNA  
223 expression was quantified at 24 h post-infection. IFN- $\beta$ , TNF- $\alpha$ , IL-6, and IL-12p40 were  
224 significantly upregulated in response to DIP infection compared to WT (Fig. 7A). In  
225 addition, WT infection at MOI of 10 still did not induce cytokine expression (Fig. S4). IL-  
226 12 is critical for Th1 polarization and cytotoxic cellular immune responses<sup>38</sup>. We validated  
227 the IL-12p40 RNA expression by measuring the protein with enzyme-linked  
228 immunosorbent assay (ELISA). DIP induced 30-fold more IL-12p40 protein than WT  
229 infection (Fig. 7B). The ability of DIP to stimulate the innate immune responses *in vivo*  
230 was also determined. Two days after intraperitoneal injections of viruses, there were five  
231 times as many peritoneal exudate cells (PECs) in DIP-infected as in mock-infected mice  
232 and significantly more cells than in WT-infected mice (Fig. 7C). Flow cytometry analysis  
233 of cellular compositions revealed that DIP significantly induced more plasmacytoid DCs  
234 (pDCs) than WT (Fig. 7D). As pDCs produce IFN-I<sup>39</sup>, we also detected the upregulation  
235 of ISG54 and IFIT2 in the PECs of DIP-infected mice compared to those of WT-infected  
236 mice (Fig. 7E). Taken together, the foregoing results indicate that DIP is highly efficacious  
237 at inducing inflammatory responses.

238 **Discussion**

239 An effective  $\gamma$ -herpesvirus vaccine should protect against the establishment of latency  
240 given the association between latent infection and tumorigenesis. Several vaccine  
241 strategies targeting single viral antigens were previously tested in the MHV-68 mouse  
242 infection model. These antigens reduced infectious mononucleosis-like symptoms of  
243 lymphoproliferation but failed to limit establishment of latency<sup>40-45</sup>. This finding resembles  
244 that reported for a clinical trial of EBV gp350-based vaccines<sup>9</sup>. The only vaccine strategy  
245 proven to reduce long-term latent viral loads in the MHV-68 model was based on live  
246 attenuated viruses designed to be latency-deficient<sup>27,46-50</sup>. However, a major drawback of  
247 latency-deficient viruses is the ability to undergo lytic replication<sup>51</sup>. In this study, we tested  
248 a strategy to attenuate the *in vivo* replication of the vaccine virus by inactivating viral  
249 antagonists of the IFN-I response. IFN-I is the first line in host antiviral defense and is  
250 critical in the development of effective immune responses. IFNs bridge innate and  
251 adaptive immunity by activating dendritic cells and inducing Th1 and potent antibody  
252 responses<sup>52-55</sup>. IFN-I has been tested as an adjuvant for vaccines against several distinct  
253 viruses including influenza, HIV, Ebola, CMV, and  $\gamma$ -herpesviruses<sup>56-60</sup>. Interestingly,  
254 Aricò et al. used MHV-68 to demonstrate an increase in viral-specific antibody titers when  
255 heat-inactivated virus was co-administered with IFN- $\alpha$ /- $\beta$ <sup>56</sup>. We proposed that disarming  
256 viral IFN-I evasion genes may facilitate the IFN-I response, providing the adjuvanticity  
257 required for attenuated viral vaccines. In addition, we also inactivated viral inhibitor of  
258 MHC class I presentation pathway and deleted the latency locus to increase the  
259 immunogenicity and safety of the vaccine virus, DIP. The present study demonstrates  
260 that DIP is highly attenuated yet maintains overall immunogenicity relatively similar to WT.

261 DIP cannot undergo productive infection or persist *in vivo*. Despite its attenuated  
262 replication, DIP elicits robust innate immune responses (e.g. IL-12), memory T cells, and  
263 virus-specific antibodies with neutralizing activity. Single DIP vaccination protected  
264 against latency establishment following WT challenge. DIP-mediated protection was  
265 durable as all immunized mice remained fully protected even 6 months after a single  
266 vaccination.

267

268 Antibodies represent the first line of vaccine-mediated protection. Nevertheless, the ideal  
269 prophylactic vaccine also induces protective cellular immunity. The adoptive transfer  
270 experiments revealed that DIP-induced, virus-specific T cells and antibodies complement  
271 each other to provide optimal protection (Fig. 6A). While CD4+ T-cells alone have little  
272 protective capacity, they collaborate with CD8+ T-cells to provide protection (Fig. 5). This  
273 CD4-CD8 collaboration occurred with either WT- or DIP-primed T-cells indicating the  
274 capability of DIP to elicit effective adaptive immunity. It is recognized that CD4+ T-cells  
275 optimize the development and maintenance of memory CD8+ T-cells<sup>61,62</sup>. However, it is  
276 unclear whether memory CD8+ T-cells absolutely require this help from CD4+ T-cells or  
277 are simply enhanced by them<sup>63</sup>. The expansion of donor CD8+ T-cells in mice receiving  
278 total T cells did not surpass that in mice only receiving CD8+ T-cells (Fig. S3). Previous  
279 work indicated that memory CD4+ T-cells enhance the functionality of memory CD8+ T-  
280 cells<sup>64-66</sup> but this enhancement was not examined in this study. Furthermore, the effect  
281 of memory CD4+ T-cells observed here may not have been mediated by enhancing  
282 memory CD8+ T-cells responses. Rather, CD4+ and CD8+ T-cells may target different  
283 infected cells, complementing each other, to provide effective protection against latency

284 establishment in response to WT challenge. The mechanisms underlying the T-cell  
285 collaboration identified herein merit further investigation. It is clear that a prophylactic  
286 vaccine against  $\gamma$ -herpesvirus should prime both memory CD8+ and CD4+ T-cells.

287

288 A live viral vaccine induces a broad immune response against multiple viral targets  
289 especially when the mechanisms required for protection against a pathogen are not  
290 known. Furthermore, by mimicking an infection, a live vaccine stimulates multiple innate  
291 immune responses, robustly induces inflammatory and immunomodulatory cytokines,  
292 and provides adjuvanticity for long-lasting vaccine-mediated protective immunity.  
293 Nevertheless, most viruses have evolved strategies to counteract the host innate immune  
294 system. Data from BMDMs infected *in vitro* and PECs from infected mice indicates that  
295 DIP induces a stronger inflammatory response than WT (Fig. 7), partially accounting for  
296 the effective immunogenicity of DIP. DIP also recruits more pDCs than WT, which could  
297 also explain the ability of DIP to elicit robust CD8+ T-cells and antibody responses in spite  
298 of its highly attenuated replication<sup>67-70</sup>. Future experiments examining the role of specific  
299 cytokines or pDCs via genetic knockout and antibody depletion approaches may reveal  
300 how DIP-induced innate immune responses impact humoral and cellular immunity.  
301 Increased inflammatory cytokine production favors SLEC generation whereas shortening  
302 the duration of inflammation has been shown to accelerate MPEC development<sup>71,72</sup>. DIP-  
303 mediated inflammatory responses could be short-lived as DIP is highly attenuated *in vivo*.  
304 The heightened but transient DIP-induced inflammation appears to prime a robust T-cell  
305 response towards the MPEC phenotype.

306

307 The development of vaccines against human  $\gamma$ -herpesviruses has been hindered by their  
308 restricted host range. Neither EBV or KSHV infects small animals. While the results from  
309 mouse studies are not always directly translatable to humans, mouse models have been  
310 instrumental in elucidating fundamental principles that cannot be directly tested in  
311 humans. MHV-68 infection in mice provides a powerful, easily manipulated small animal  
312 model for analyzing fundamental events associated with the infection and immune control  
313 of  $\gamma$ -herpesviruses<sup>73-78</sup>. Moreover, the MHV-68 model serves to assess proof-of-concept  
314 vaccine strategies<sup>79</sup>. The results from the present study provides the guidance for a  
315 rational design of effective live EBV and KSHV vaccines that are highly attenuated and  
316 deficient in latency. Deletion of viral immune evasion genes may provide a strategy for  
317 the construction of safe yet immunogenic live vaccines against other pathogens.  
318



319 **Acknowledgements**

320 The authors thank the UCLA CFAR Virology Core (P30 AI028697) for their help with viral  
321 genome copy number analysis. We also thank the UCLA Jonsson Comprehensive  
322 Cancer Center (P30 CA016042) and the CFAR Flow Cytometry Core Facility (P30  
323 AI028697) for assistance with flow cytometry. We thank Edward J. Usherwood of  
324 Dartmouth College and In-Jeong Kim, Kathleen G. Lanzer, and Tres Cookenham of the  
325 Trudeau Institute for scientific advice and discussion. We thank Timothy March and the  
326 UCLA Division of Laboratory Animal Medicine for veterinary assistance. We thank  
327 Autumn York and Steve J. Bensinger for providing bone marrow-derived macrophages.  
328 We would like to thank Editage ([www.editage.com](http://www.editage.com)) for English language editing. G.B. and  
329 A.K.L were supported by an Interdisciplinary Training in Virology and Gene Therapy  
330 Training grant (No. NIH T32 AI 060567). The study was supported by NIDCR DE023591  
331 (R01) and NCI CA177322 (P01).

332

333 **Author contributions**

334 G.B., N.F., R.S., and T.T.W. conceived and planned the experiments. G.B. and N.F.  
335 carried out the experiment with the help of A.S., A.K.L., W.W.L., L.T., Y.H.K., and T.H.  
336 G.B., N.F., R.S., and T.T.W. analyzed and interpreted the results. C.F.W., and M.A.B.  
337 provided critical scientific advice to the research described in this manuscript. G.B., N.F.,  
338 and T.T.W. wrote the manuscript with inputs from A.K.L., W.W.L., M.A.B., C.F.W., and  
339 R.S.

340

341 **Author information**

342 Correspondence and requests for materials should be addressed to T.T.W  
343 ([twu@mednet.ucla.edu](mailto:twu@mednet.ucla.edu)).

344

345 **Competing interests**

346 The authors declare no competing financial interests.

**Figure 1**

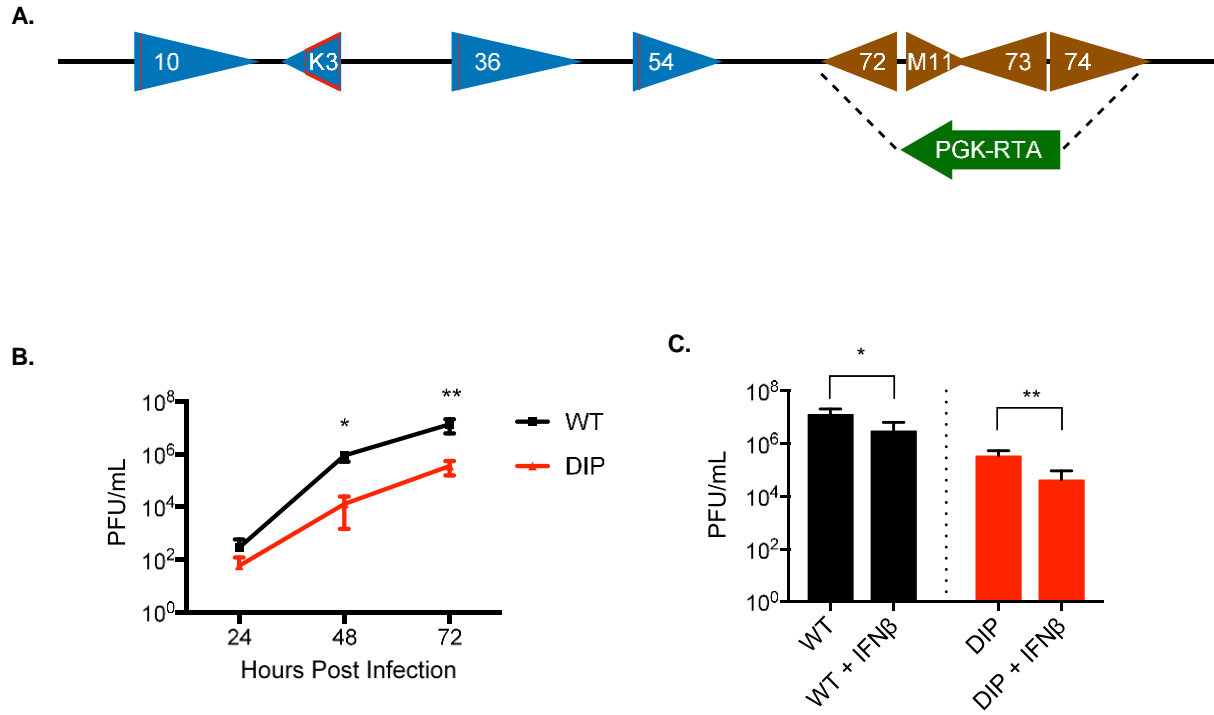

349 **Figure 1. Construction of DIP virus and its replication properties in vitro**  
350 **(A)** Schematic representation of mutations introduced in the MHV-68 genome to generate  
351 the DIP vaccine. Red lines indicate insertion of translation stop codons into ORF10,  
352 ORF36, and ORF54. The open red tetragon indicates deletion of the coding sequence in  
353 K3. The latency locus was replaced by the RTA cassette (arrowhead) constitutively driven  
354 by the PGK promoter. **(B)** Growth curves of the WT and DIP viruses in 3T3 cells using  
355 MOI = 0.01 and measured by plaque assay to quantify virion production. **(C)** NIH 3T3  
356 cells were either mock treated or treated with 100 U mL<sup>-1</sup> IFN-β for 24 h then infected with  
357 either WT or DIP virus at MOI = 0.01 for 72 h. Virion production was quantified with plaque  
358 assays. All experiments were performed in triplicate and statistical significance was  
359 analyzed by a two-tailed Student's *t*-test. Graphs represent means of triplicates with SD.  
360

Figure 2

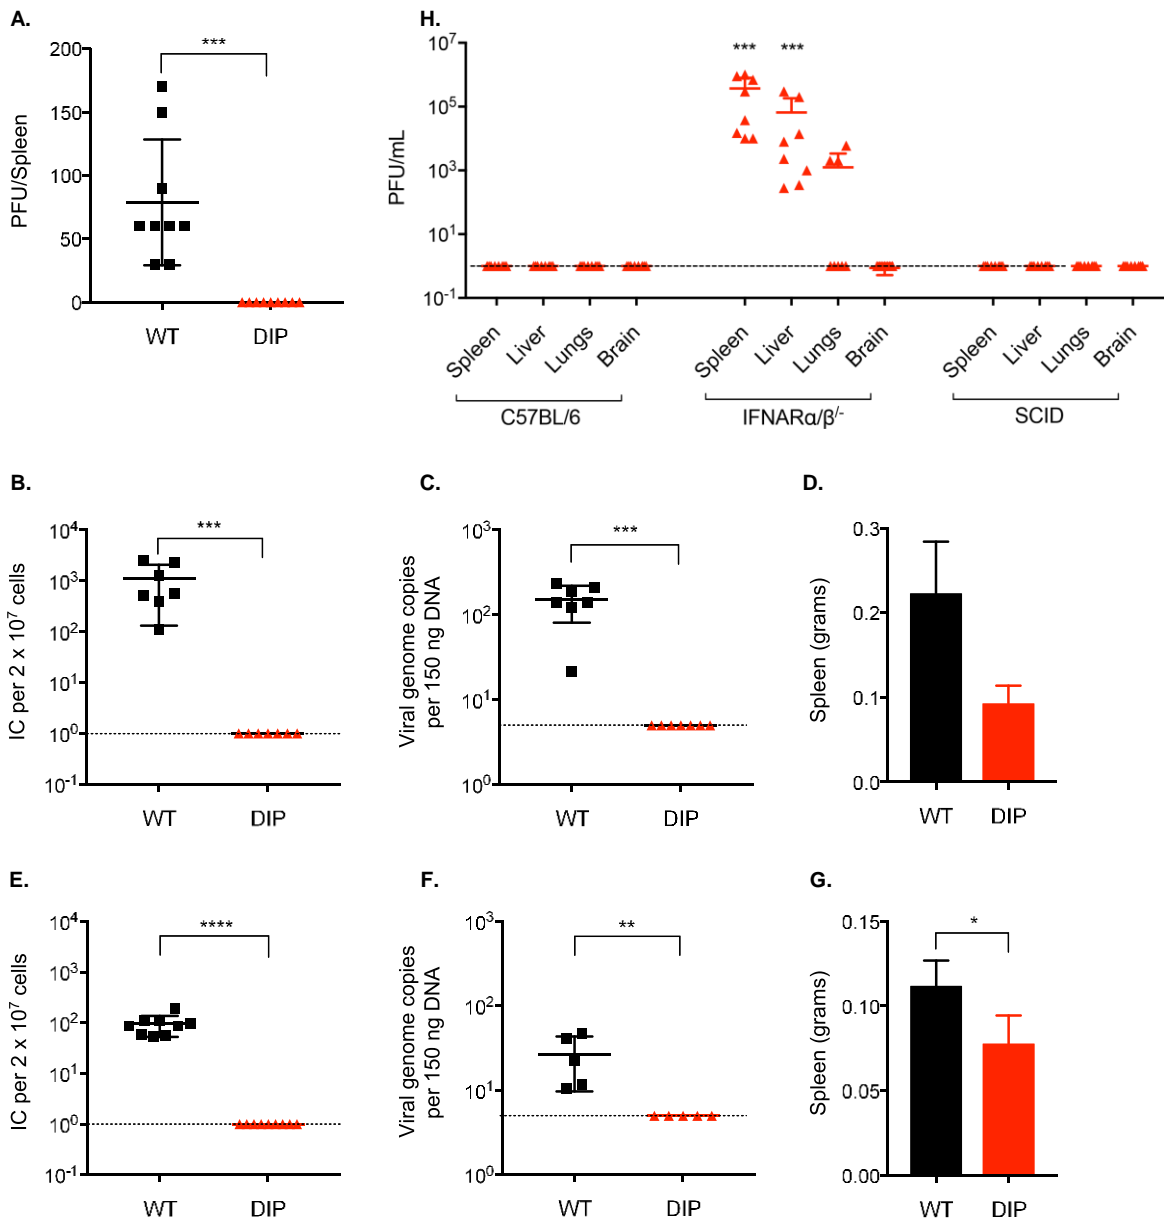

362 **Figure 2. DIP produces no infectious virions and is latency deficient in vivo**

363 All infections were performed intraperitoneally using  $10^5$  PFU WT or DIP. (A) Productive  
364 infection in the spleens 72 h post-infection was assessed by plaque assay. (B) Latent  
365 infection in the spleens at 14 d post-infection was evaluated by infectious center  
366 assay and (C) qPCR analysis of viral DNA copy numbers. (D) Spleen weight at 14 d post-  
367 infection was measured. No statistically significant difference was found between WT-  
368 and DIP-infected mice. (E) Latent infection in the spleen at 2 mo post-infection was  
369 measured by infectious center assay and (F) qPCR analysis of viral DNA copy numbers.  
370 (G) Spleen weight at 2 mo post-infection was measured. (H) Spleens, livers, lungs, and  
371 brains of DIP infected C57BL/6, IFNAR<sup>-/-</sup>, and SCID mice were harvested at 3 d post-  
372 infection. Infectious viruses were determined by plaque assay. The graphs except (A)  
373 depicts the pooled data from 2 independent experiments using different numbers of mice  
374 for each replicate. Symbols indicate individual mice and data are means and SD.  
375 Statistical significance was determined by a two-tailed Student's *t*-test.

376

Figure 3

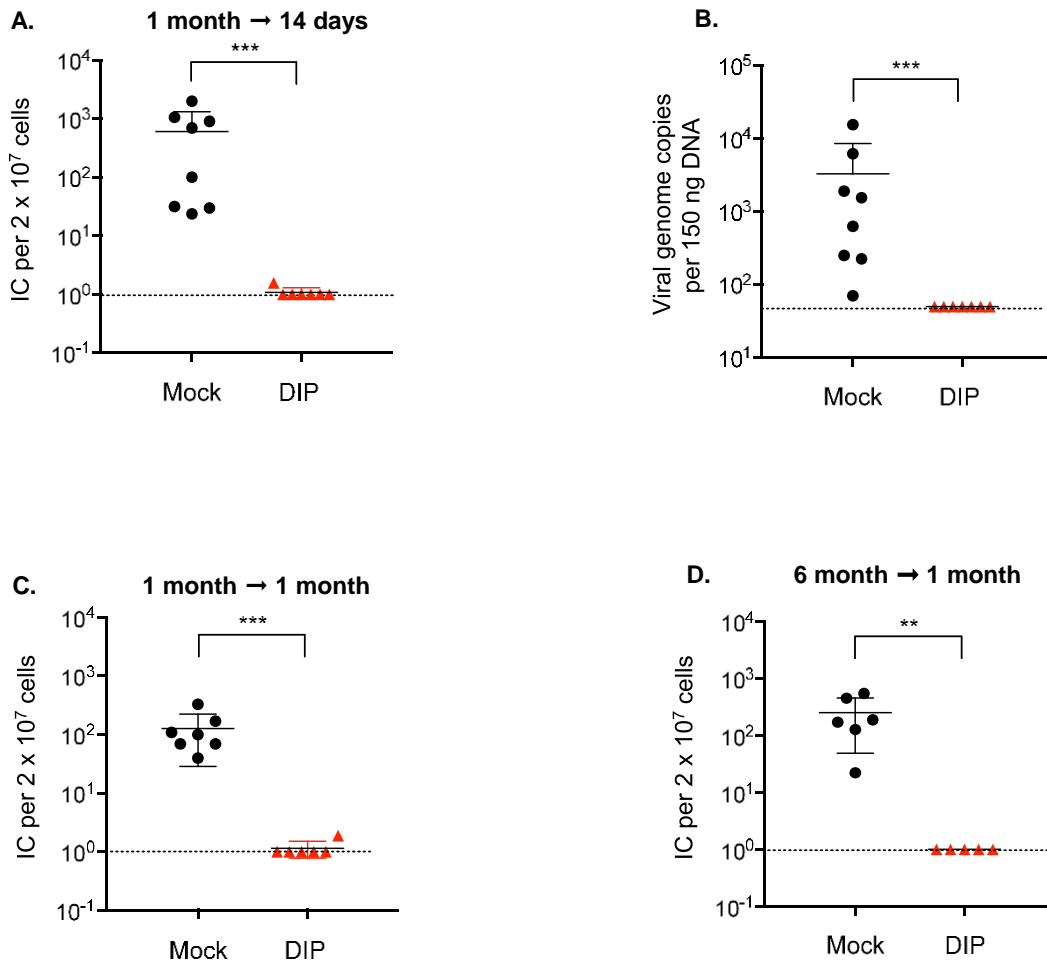

378 **Figure 3. DIP vaccination confers durable protection**

379 Mice were intraperitoneally vaccinated with  $10^5$  PFU DIP and challenged intranasally with  
380  $5 \times 10^3$  PFU WT virus at 1 (**A-C**) or 6 (**D**) mo post-vaccination. Latent infection in the  
381 spleen was examined at 14 (**A, B**) or 28 (**C, D**) d after challenge. Viral loads were  
382 determined by infectious center assay (**A, C, D**) and qPCR (**B**). Dotted line indicates  
383 detection limit. The graph depicts the pooled data from 2 independent experiments using  
384 different numbers of mice for each replicate. Data for individual mice, means, and SD  
385 were plotted. Statistical significance was analyzed by a two-tailed Student's *t*-test.

386



Figure 4

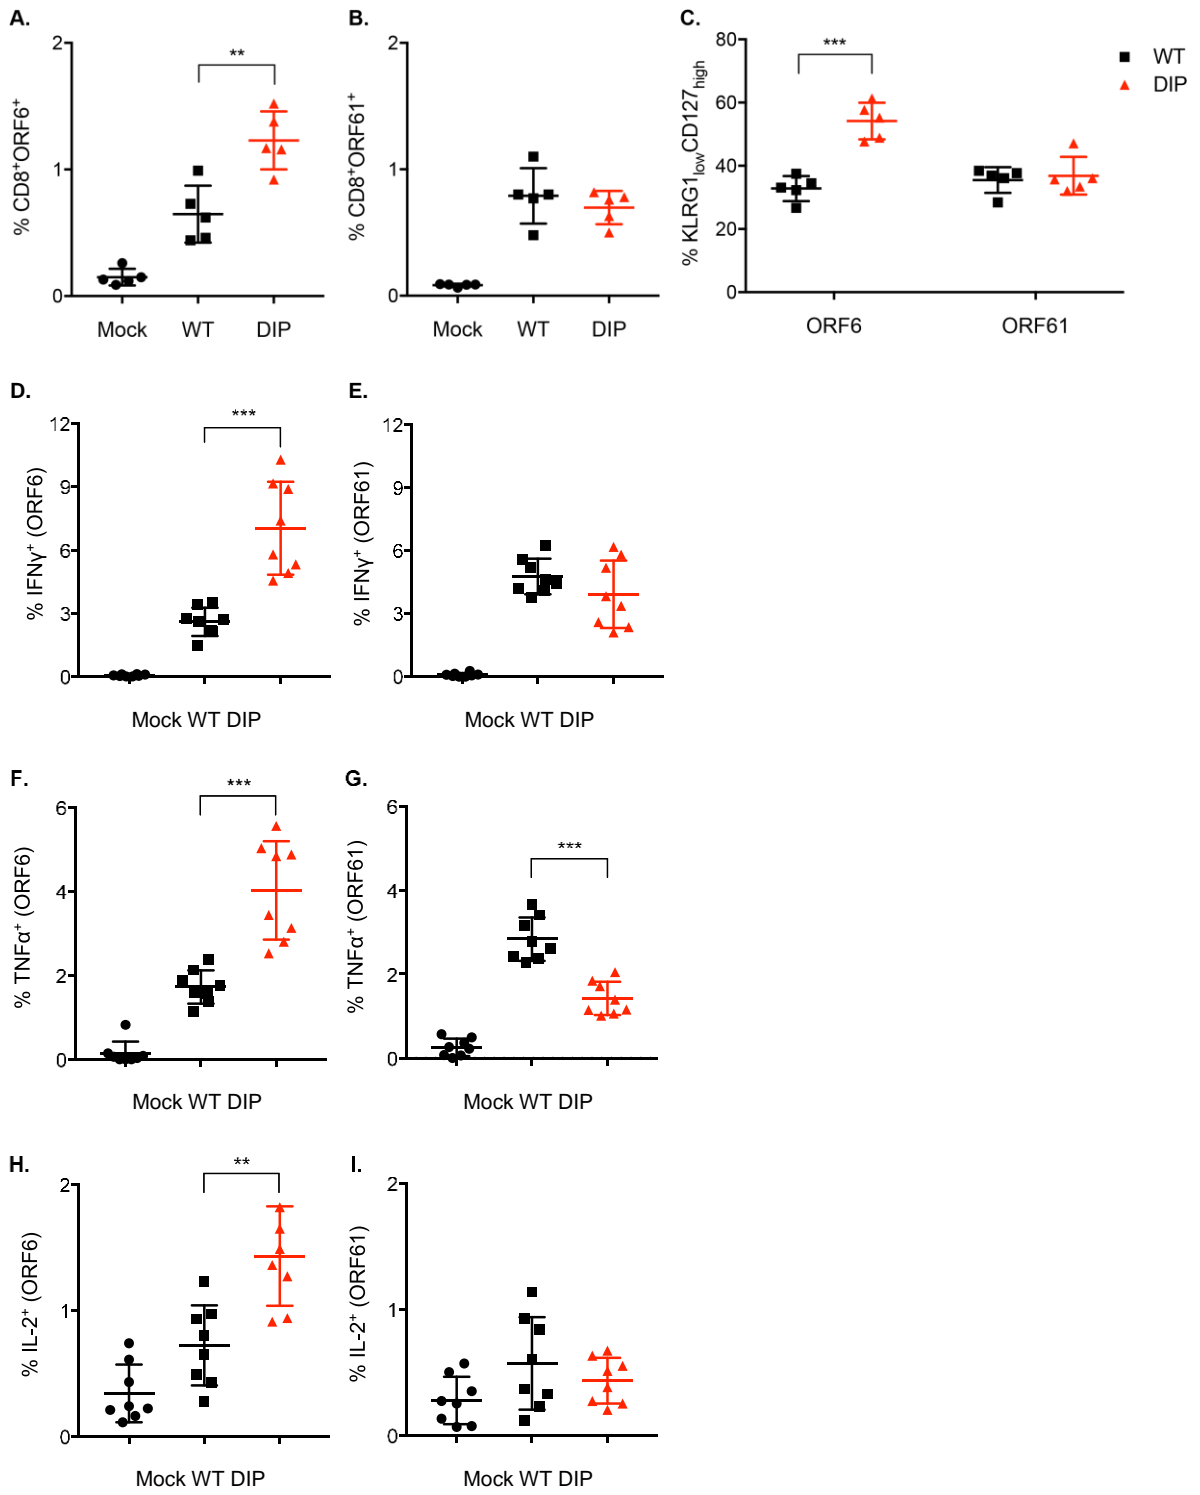

388 **Figure 4. DIP elicits robust virus-specific T cell immunity**

389 Mice were mock-infected or intraperitoneally injected with  $10^5$  PFU WT or DIP. **(A, B)** At  
390 2 mo post-infection, splenocytes were harvested and examined for virus-specific CD8+ T  
391 cells using the tetramers ORF6<sub>487-495</sub>/Db and ORF61<sub>524-531</sub>/Kb. **(C)** Tetramer-positive  
392 CD8+ T cells were examined for KLRG1 and CD127 expression. **(D-I)** Splenocytes were  
393 stimulated with ORF6<sub>487-495</sub> peptide **(D, F, H)** or ORF61<sub>524-531</sub> peptide **(E, G, I)** and stained  
394 for intracellular IFN- $\gamma$  **(D, E)**, TNF- $\alpha$  **(F, G)**, and IL-2 **(H, I)**.  
395

Figure 5

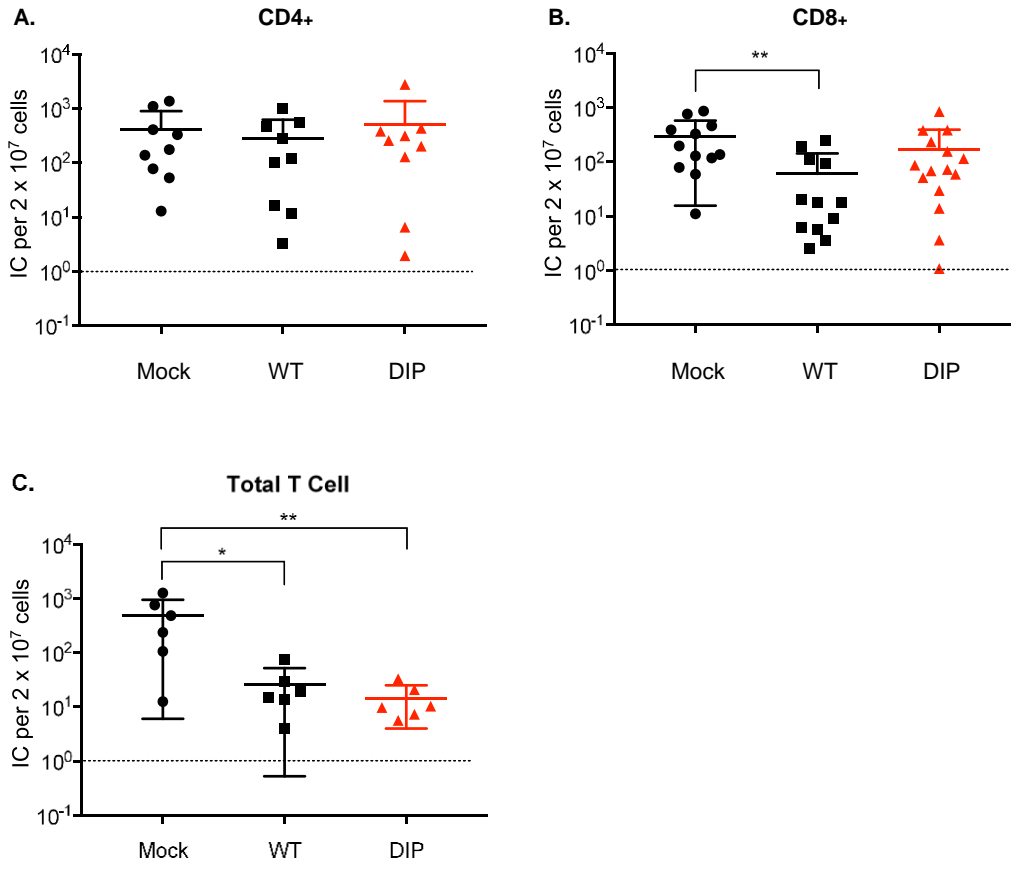

397 **Figure 5. CD4+ and CD8+ T-cells confer antiviral protection**

398 CD4+, CD8+, or total T cells were purified via negative selection from the spleens of  
399 mock-infected mice or mice that were intraperitoneally infected with  $10^5$  PFU WT or DIP  
400 2 mo previously. Three million CD4+ (**A**), CD8+ (**B**), or total T (**C**) cells were transferred  
401 to a congenic mouse by tail vein injection. The recipient mice were intranasally challenged  
402 with  $5 \times 10^3$  PFU WT at 24 h post-transfer. Latent infection in the spleen at 14 d post  
403 challenge was measured by infectious center assay. Pooled data from 2 independent  
404 experiments using different numbers of mice for each replicate. Data for individual mice,  
405 means, and SD were plotted. Statistical significance was analyzed by a two-tailed  
406 Student's *t*-test.

407

Figure 6

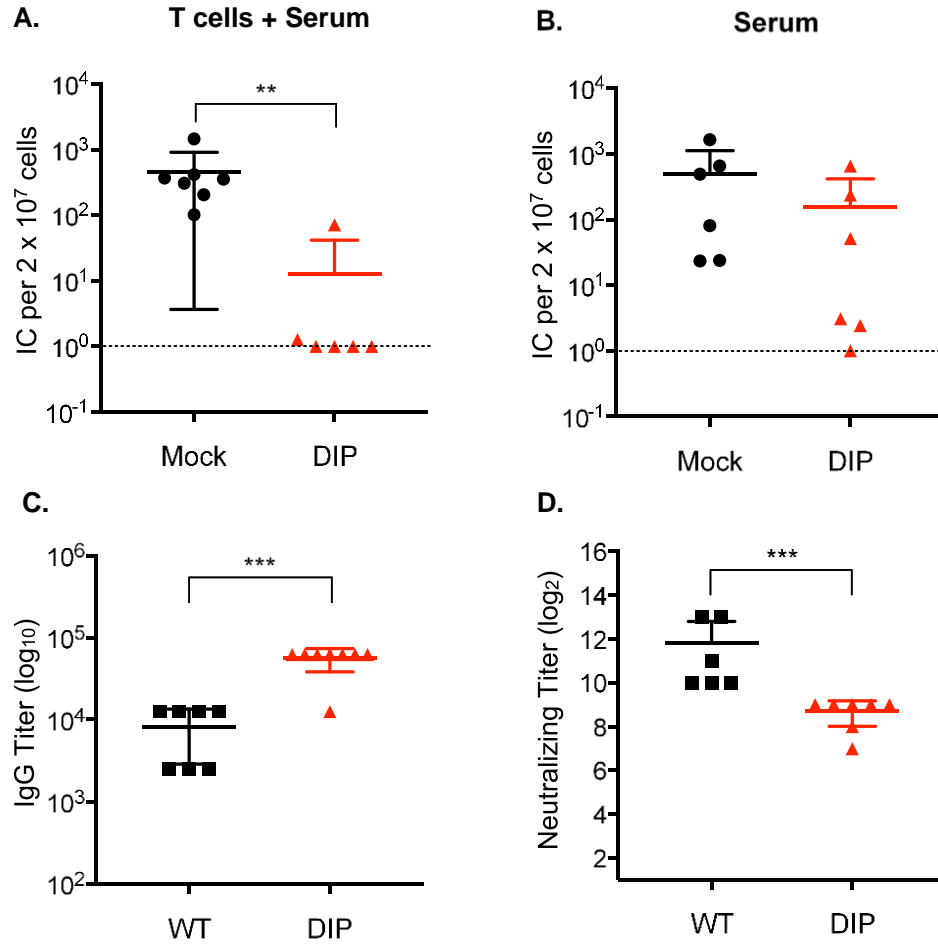

409 **Figure 6. DIP vaccination elicits protective antibodies**

410 Mice were intraperitoneally infected with  $10^5$  PFU WT or DIP 2 mo previously. **(A)** Total  
411 T cells and sera isolated from mock- or DIP-infected mice were transferred to congenic  
412 naïve mice by tail vein and intraperitoneal injections, respectively. Recipient mice were  
413 intranasally challenged 24 h later with  $5 \times 10^3$  PFU WT virus. Latent infection in the spleen  
414 at 14 d post-challenge was assessed by infectious center assay. **(B)** Sera collected from  
415 uninfected- or DIP-infected mice were transferred to naïve mice that were intranasally  
416 challenged 24 h later with  $5 \times 10^3$  PFU WT virus. Latent infection in the spleen at 14 d  
417 post-challenge was evaluated by infectious center assay. **(C, D)** Sera collected from  
418 infected mice were analyzed for virus-specific IgG by ELISA and for neutralizing activity.  
419 Pooled data from 2 independent experiments using different numbers of mice for each  
420 replicate. Means and SD were plotted. Statistical significance was analyzed by a two-  
421 tailed Student's *t*-test.

422

Figure 7

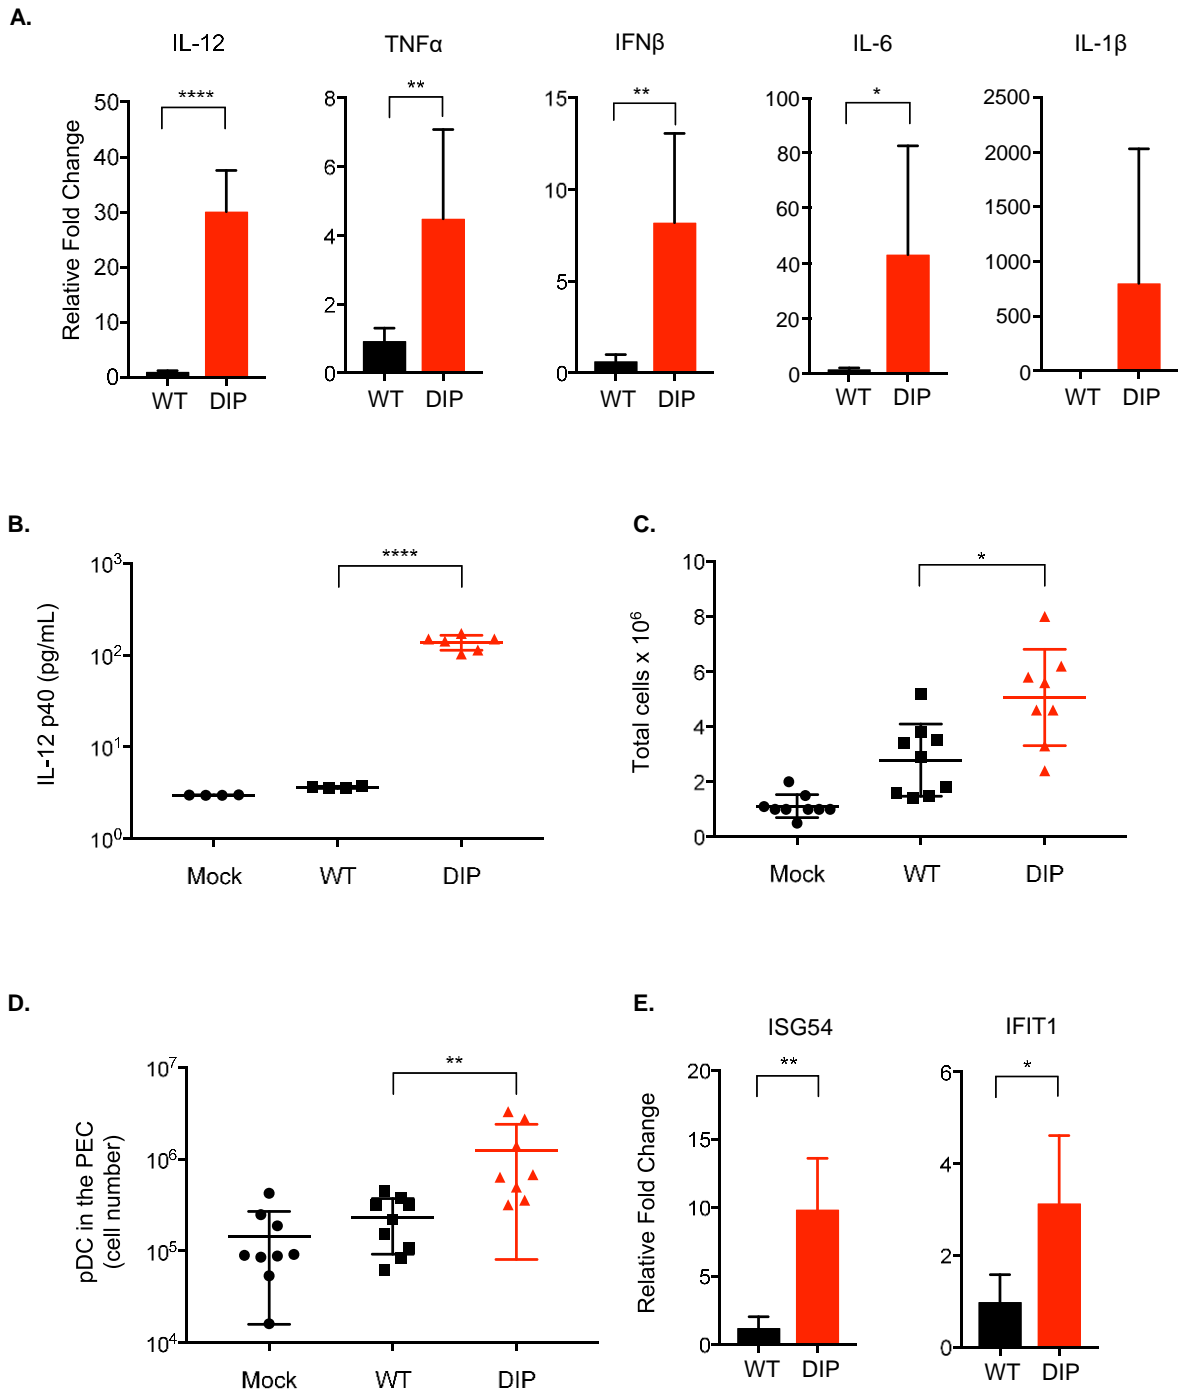

424 **Figure 7. DIP elicits inflammatory and immunomodulatory cytokines**

425 Mouse BMDMs were infected with WT or DIP at MOI = 1 (triplicate). **(A)** Total RNA was  
426 extracted 24 h post-infection for reverse transcription and qPCR to measure the  
427 expression levels of IFN- $\beta$ , IL-1 $\beta$ , TNF- $\alpha$ , IL-6, IL-12, and  $\beta$ -actin. Cytokine RNA  
428 expression was normalized against  $\beta$ -actin and the relative fold change was calculated  
429 by comparison with mock-infected BMDM. **(B)** Supernatants were collected 24 h post-  
430 infection to measure IL-12p40 production by ELISA. Mice were either mock-infected or  
431 intraperitoneally injected with  $10^5$  PFU WT or DIP. PECs were collected at 48 h post-  
432 infection. **(C)** Total cell numbers in the PECs were counted. **(D)** The pDCs were identified  
433 by gating on the Lin<sup>-</sup>(CD3<sup>-</sup>CD19<sup>-</sup>NK1.1<sup>-</sup>)B220<sup>+</sup>CD11c<sup>Int</sup>PDCA-1<sup>+</sup> population. **(E)** Total  
434 RNA was extracted from the PECs. RNA expression of ISGs was analyzed by quantitative  
435 PCR. Means and SD were plotted. Statistical significance was analyzed by a two-tailed  
436 Student's *t*-test.



437 **Materials & Methods**

438

439 ***Viruses and cells***

440 WT MHV-68 was obtained from the American Type Culture Collection (ATCC; Vr1465;  
441 Manassas, VA, USA). WT and DIP viruses were propagated in 3T3 and Vero cells and  
442 titered by plaque assay. Viruses were concentrated by high-speed centrifugation and  
443 resuspended in serum-free Dulbecco's modified Eagle's medium (DMEM). Vero cells  
444 were cultured in DMEM containing 10% (w/v) fetal bovine serum (FBS) supplemented  
445 with penicillin and streptomycin. The 3T3 cells were cultured in DMEM containing 10%  
446 (w/v) bovine calf serum (BCS) and 1% penicillin and streptomycin.

447

448 ***Plaque assay***

449 Each sample was serially diluted tenfold and incubated on Vero cells on 12-well plates in  
450 duplicate. The inoculum was removed after 1 h of incubation and the cells were overlaid  
451 with 1% (w/v) methylcellulose in DMEM containing 10% (w/v) FBS. Six days post-  
452 infection, the cells were fixed with 2% (w/v) crystal violet in 20% (v/v) ethanol. Viral titers  
453 were determined by counting plaque numbers. To determine viral titers in the mouse  
454 tissues, 1-mL homogenates were prepared in a Dounce homogenizer (Thomas Scientific,  
455 Swedesboro, NJ, USA) and used for the plaque assay. Plaques were counted and viral  
456 titers in each tissue were expressed in PFU mL<sup>-1</sup>.

457

458 ***In vitro growth curve***

459 The 3T3 cells were plated on media with or without IFN- $\beta$  (100 U mL<sup>-1</sup>) for 24 h. Cells  
460 were infected at MOI = 0.01 with WT or DIP virus for 1 h at 37 °C. The inoculum was then  
461 removed and the cells were washed twice with media before adding fresh media with or  
462 without IFN- $\beta$  (100 U mL<sup>-1</sup>). Cells and supernatant were harvested 24 h, 48 h, and 72 h  
463 post-infection for the plaque assay.

464

### 465 ***Construction of DIP vaccine***

466 The recA+ *Escherichia coli* GS500 harboring a BAC containing the WT MHV-68 genome  
467 was used to construct recombinant MHV-68 by allelic exchange with conjugation-  
468 competent *E. coli* GS111 containing the suicide shuttle plasmid pGS284<sup>74-76</sup>. For each  
469 recombinant MHV-68, an overlap extension PCR was used to construct the unique shuttle  
470 plasmid pGS284 harboring the desired mutation and a ~500-bp flanking region.  
471 Sequences upstream of the desired mutation (A fragments) were amplified by AF and AR  
472 primers. The downstream sequences (B fragments) were amplified by BF and BR primers  
473 using wild type MHV-68 virion DNA as the template. The A and B fragments had > 20-bp  
474 overlapping sequences. For the subsequent PCR reaction, the A and B fragments were  
475 used as templates and amplified by AF and BR primers. The final PCR products were  
476 digested with the appropriate enzymes and cloned into pGS284. To screen for the correct  
477 mutation, restriction enzyme digestion was performed on the PCR products obtained  
478 using the AF and BR primers on the BAC MHV-68 clones. Sequential allelic exchanges  
479 were conducted to obtain the final recombinant clone containing all the designed  
480 mutations (Fig. 1). After the desired recombinant clone was selected, the MHV-68 BAC  
481 was purified and transiently transfected with Lipofectamine™ 2000 into 293T cells with

482 equal amounts of plasmid expressing Cre recombinase to remove the BAC sequence.  
483 Three days post transfection, a single viral clone was isolated by limiting dilution. It was  
484 then propagated for use in subsequent experiments. The viruses were quantified by  
485 plaque assay and limiting dilution.

486 The ORF36 and ORF54 primers were used to construct the shuttle plasmids<sup>18,80</sup>. Primers  
487 used to construct the other shuttle plasmids are listed in Supplementary Table 1. Primers  
488 1-8 were used to construct shuttle plasmids for the stop codon mutation. To construct  
489 the shuttle plasmid to replace the latency locus with RTA expression driven by the PGK  
490 promoter, four fragments were amplified with primers 9-16, A (ORF72), B (RTA coding  
491 sequence and poly A tail), C (PGK promoter), and D (ORF74). The ABCD fused fragment  
492 was then generated to be cloned into pGS284.

493

#### 494 ***Mice***

495 The animal studies were approved by the Animal Research Committee at the University  
496 of California, Los Angeles (UCLA), Los Angeles, CA, USA. Female C57BL/6J, SCID, and  
497 B6.SJL-*Ptprc<sup>a</sup> Pepc<sup>b</sup>*/BoyJ mice were obtained from Jackson Laboratory, Bar Harbor,  
498 ME, USA. IFNAR<sup>-/-</sup> mice were donated by Genhong Cheng at UCLA. Mice aged 6-8 wks  
499 were intraperitoneally infected with 10<sup>5</sup> PFU virus in 200 μL. Intranasal vaccinations and  
500 challenges were performed by anesthetizing the mice with isoflurane and administering  
501 20 μL virus dropwise. At the endpoint, mice were euthanized and their tissues were  
502 collected in 1 mL DMEM and homogenized with mesh filters and a Dounce homogenizer.  
503 Tissue lysates were clarified by centrifugation and used in the plaque assays. Their DNA  
504 was extracted with a DNeasy blood and tissue kit (Cat. No. 69504; Qiagen, Hilden,

505 Germany). For the infectious center assay and the flow cytometry study, single-cell  
506 suspensions were obtained from the spleens and the red blood corpuscles were lysed in  
507 ACK (ammonium-chloride-potassium) buffer.

508

509 ***Phenotyping virus-specific T cells***

510 Before staining, the splenocytes were incubated with FC block (No. 553142; BD  
511 Bioscience, Franklin Lakes, NJ, USA). Tetramers were obtained from the NIH Tetramer  
512 Core Facility, Atlanta, GA, USA. Allophycocyanin-conjugated MHCI tetramers specific for  
513 the MHV68 epitopes D<sup>b</sup>/ORF6487–495 (AGPHNDMEI), K<sup>b</sup>/ORF61524–531 (TSINFVKI),  
514 K<sup>b</sup>/ORF75c940–947 (KSLTYYYKL), and K<sup>b</sup>/ORF8<sub>604-612</sub> (KNYIFEEKL) were incubated  
515 with splenocytes for 1 h at room temperature. Surface-staining with the following  
516 antibodies was performed by incubation at 4 °C for 30 min: anti-KLRG1 (No. 46-5893;  
517 eBioscience/Affymetrix, Santa Clara, CA, USA), anti-CD127 (No. 17-1273;  
518 eBioscience/Affymetrix, Santa Clara, CA, USA), anti-CD8 (No. 48-0081;  
519 eBioscience/Affymetrix, Santa Clara, CA, USA), anti-CD4 (No. 11-0042;  
520 eBioscience/Affymetrix, Santa Clara, CA, USA), anti-CD3 (No. 25-0031;  
521 eBioscience/Affymetrix, Santa Clara, CA, USA), anti-CD44 (No. 11-0441;  
522 eBioscience/Affymetrix, Santa Clara, CA, USA), anti-CD62L (No. 83-062;  
523 eBioscience/Affymetrix, Santa Clara, CA, USA), anti-CCR7 (No. 47-1971;  
524 eBioscience/Affymetrix, Santa Clara, CA, USA), anti-CD45.1 (No. 47-0453;  
525 eBioscience/Affymetrix, Santa Clara, CA, USA), and anti-CD45.2 (No. 12-0454;  
526 eBioscience/Affymetrix, Santa Clara, CA, USA). For intracellular staining, BD Cytotfix and  
527 Cytoperm (Cat. No. 554714; BD Bioscience, Franklin Lakes, NJ, USA) were used before

528 incubating splenocytes with anti-IFN- $\gamma$  (No. 17-7311; eBioscience/Affymetrix, Santa  
529 Clara, CA, USA), anti-TNF- $\alpha$  (No. 46-7321; eBioscience/Affymetrix, Santa Clara, CA,  
530 USA), and anti-IL-2 (No. 25-7021; eBioscience/Affymetrix, Santa Clara, CA, USA)  
531 antibodies at room temperature for 30 min. All samples were fixed in 1% (w/v)  
532 paraformaldehyde (PFA). All experiments were analyzed on a SORP BD LSRII analytic  
533 flow cytometer (BD Bioscience, Franklin Lakes, NJ, USA). Data were analyzed in FlowJo  
534 (FlowJo LLC, Ashland, OR, USA).

535

### 536 ***Ex vivo T cell peptide stimulation***

537 B cells in splenocytes were depleted by incubation in flasks coated with AffiniPure goat  
538 anti-mouse IgG (H+L) (Jackson ImmunoResearch Laboratories Inc., West Grove, PA,  
539 USA) for 1 h at 37 °C. B-cell-depleted splenocytes from infected mice (CD45.2+) were  
540 incubated with naïve splenocytes (CD45.1+) at a 1:1 ratio in culture media containing 10  
541 U mL<sup>-1</sup> IL-12, 10  $\mu$ g mL<sup>-1</sup> brefeldin A, and 1  $\mu$ g mL<sup>-1</sup> peptide for 5 h at 37 °C. Splenocytes  
542 were stained and processed for flow cytometry with the indicated tetramers and surface  
543 marker antibodies.

544

### 545 ***Infectious center assay***

546 Serially diluted splenocytes were plated on a Vero cell monolayer and incubated overnight  
547 at 37 °C. The splenocytes were aspirated then washed off by gentle agitation. The Vero  
548 cells were overlaid with 1% (w/v) methylcellulose in DMEM containing 10% (w/v) FBS for  
549 6 d before fixing with 2% (w/v) crystal violet in 20% (v/v) ethanol. Infectious centers  
550 indicated by plaques were counted.

551

552 **Quantitative PCR (qPCR)**

553 The qPCR was performed on MJ Opticon 2 using PerfeCTA Fastmix (Quantabio, Beverly,  
554 MA, USA). For the viral genome copy number analysis, 150 ng extracted DNA (~2 x 10<sup>4</sup>  
555 cells) and the primers were annealed to the upstream of the ORF6 coding sequence  
556 (ORF6: 5'-TGCAGACTCTGAAGTGCTGACT-3' and 5'-  
557 ACGCGACTAGCATGAGGAGAAT-3') were used.

558

559 For the RNA expression analysis, cells were harvested in TRIzol (Thermo Fisher  
560 Scientific, Waltham, MA, USA) for RNA extraction according to the recommended  
561 protocol. Total RNA was treated with DNase and used for reverse transcription in a  
562 qScript cDNA synthesis kit (Quantabio, Beverly, MA, USA) to generate cDNA for qPCR.

563

564 **Gene expression analysis by qPCR**

565 Cell lysates were stored in TRIzol at -80 °C. Isolated RNA was treated with DNase I then  
566 used to generate cDNA in a qScript cDNA synthesis kit (Quantabio, Beverly, MA, USA)  
567 followed by gene expression analysis with PerfeCTa Fastmix (Quantabio, Beverly, MA,  
568 USA). The primers used in qPCR for IL-1 $\beta$ , TNF- $\alpha$ , IL-6, IL-12, and  $\beta$ -actin are listed in  
569 Supplementary Table 2.

570

571 **Infection of BMDM**

572 Cells were harvested from bone marrow and differentiated into macrophages (BMDM) by  
573 incubation for 7 d in DMEM containing 20% (w/v) FBS, 5% (w/v) M-CSF, 1% (w/v)

574 penicillin and streptomycin, 1% (w/v) glutamine, and 0.5% (w/v) sodium pyruvate. The  
575 BMDMs were infected with WT or DIP at MOI = 1. At 24 h post-infection, total RNA was  
576 extracted with TRIzol. Supernatants were collected for analysis in an IL-12/IL-23 p40  
577 (total) mouse uncoated ELISA kit (No. 88-7120-22; Thermo Fisher Scientific, Waltham,  
578 MA, USA).

579

### 580 ***Neutralizing activity***

581 Twofold serially-diluted serum was incubated with 100 PFU WT virus for 1 h at 37 °C. The  
582 mixture was plated on a Vero cell monolayer for 1 h at 37 °C then removed. The plate  
583 was overlaid with 1% (w/v) methylcellulose in DMEM containing 10% (w/v) FBS for 6 d  
584 before fixing with 2% (w/v) crystal violet in 20% (v/v) ethanol. The neutralizing titer was  
585 taken as the highest dilution maintaining the ability of the diluted serum to reduce the  
586 number of plaques by 50% relative to the virus mixture containing fourfold diluted mock  
587 serum.

588

### 589 ***Virus-specific IgG ELISA***

590 A 5 µg mL<sup>-1</sup> WT virion antigen solution coated a 96-well plate which was then incubated  
591 overnight at 4 °C. The plate was blocked overnight in PBS containing 1% (w/v) BSA and  
592 0.05% (w/v) Tween-20. The plate was washed twice with PBS-T (PBS containing 0.5%  
593 Tween-20). Mouse sera were diluted in ELISA buffer (PBS containing 0.1% BSA and  
594 0.025% Tween-20) and incubated on the plate for 1 h at room temperature. The plate  
595 was washed thrice with PBS-T and then once with PBS. A substrate solution consisting  
596 of one tablet each of *o*-phenylenediamine and urea hydrogen peroxide (No. P9187;

597 Sigma-Aldrich Corp., St. Louis, MO, USA) in 10 mL ddH<sub>2</sub>O, was added to the plate. The  
598 plate was incubated for 30 min in the dark at 4 °C. The reaction was stopped by adding  
599 4N H<sub>2</sub>SO<sub>4</sub> and the plate was read at 490 nm and 620 nm. The virus-specific IgG titer was  
600 taken as the highest dilution generating signals higher than those of the 1:50 diluted mock  
601 serum.

602

### 603 ***Serum transfer***

604 Sera were obtained from mice at 2 mo post-infection. Then 200 µL pooled heat-  
605 inactivated serum was intraperitoneally injected into naïve mice. After 24 h, the naïve  
606 recipient mice were challenged intranasally with 5 x 10<sup>3</sup> PFU WT. A second dose of 200  
607 µL pooled heat-inactivated serum was intraperitoneally injected 7 d after the WT  
608 challenge. Splenocytes were harvested 14 d after the challenge for the infectious center  
609 assay.

610

### 611 ***Adoptive T cell transfer***

612 Splenocytes were isolated from mice at 2 mo post-infection and pooled from multiple  
613 mice. Splenocytes were negatively selected for CD4, CD8, or total T cells using EasySep  
614 isolation kits (Catalog Nos. 19765, 19853, and 19851; STEMCELL Technologies Inc.,  
615 Vancouver, BC, Canada). Negative selection was confirmed by flow cytometry analysis  
616 to > 90% purity. Three million cells in 100 µL were injected into the tail vein of each  
617 B6.SJL-*Ptprca*<sup>a</sup> *Pepcb*<sup>b</sup>/BoyJ mouse. Twenty-four hours after T-cell transfer, the  
618 recipient mice were intranasally challenged with 5 x 10<sup>3</sup> PFU WT MHV-68. Spleens were  
619 harvested 14 d post-challenge for the infectious center assay and flow cytometry to



620 confirm the presence of donor T-cells in the recipient mice with anti-CD45.1 and anti-  
621 CD45.2.

622

623 ***Statistical analysis***

624 Data are presented as means and their differences were analyzed by a two-tailed  
625 unpaired Student's *t*-test unless otherwise indicated.  $P < 0.05^*$ ,  $P < 0.01^{**}$ ,  $P < 0.001^{***}$ ,  
626 and  $P < 0.0001^{****}$ .

**Figure S1**

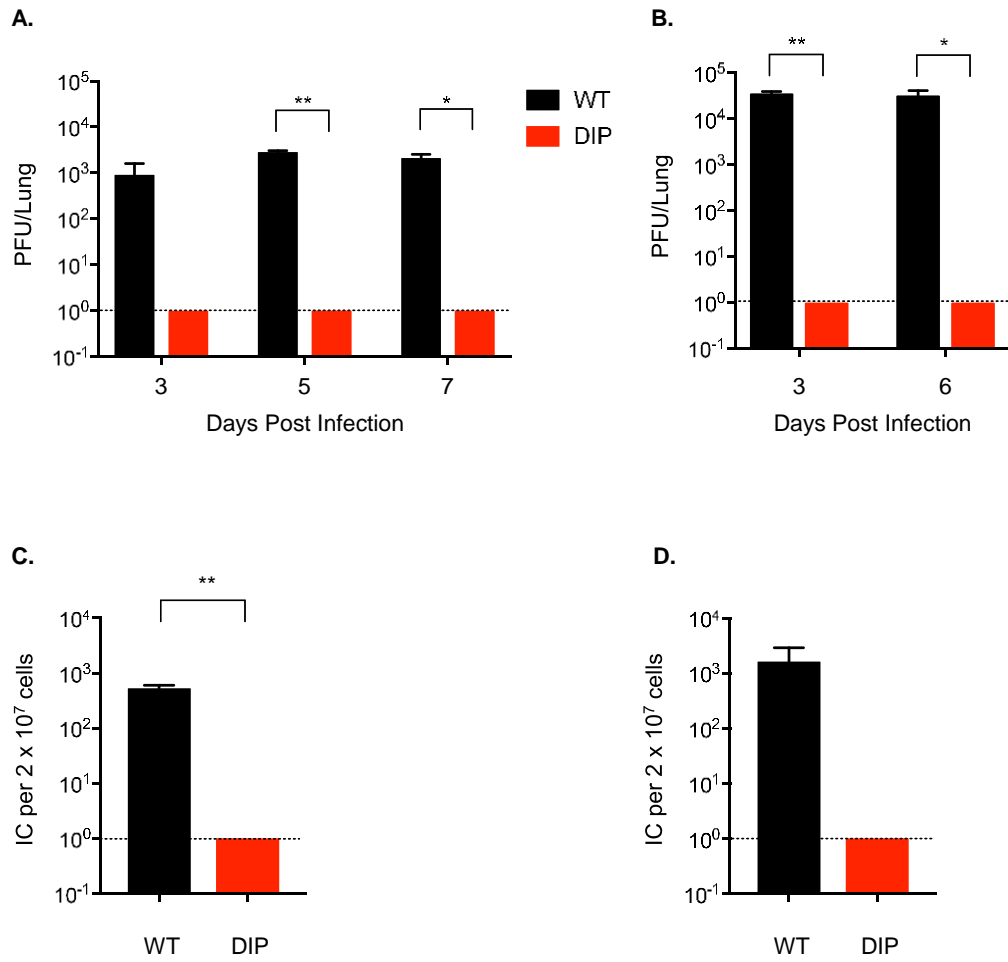

629 **Figure S1. In vivo DIP virus is both replication- and latency deficient upon**  
630 **intranasal inoculation**

631 Mice were intranasally inoculated with 5,000 (**A, C**) or  $10^5$  PFU (**B, D**) WT or DIP. (**A, B**)

632 Lungs (n = 3) were excised at the times indicated at the bottoms of the graphs for plaque

633 assay. (**C, D**) Spleens (n = 3) were excised 14 d post infection for infectious center assay.

634 Means and SD were plotted. Statistical significance was analyzed by a two-tailed

635 Student's *t*-test.

636

Figure S2

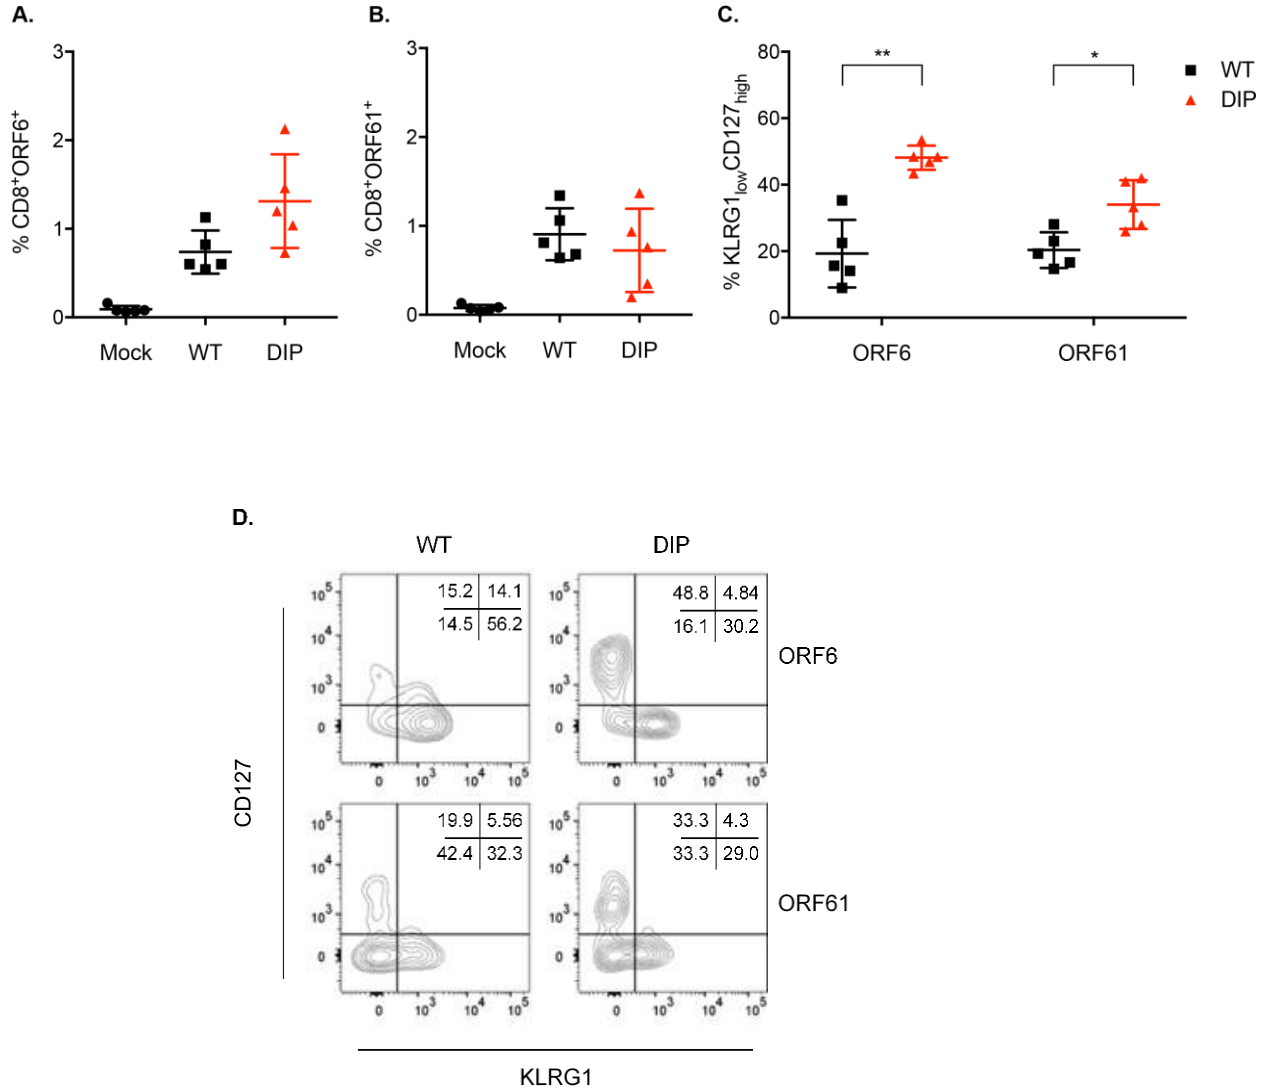

638 **Figure S2. DIP infection induces a robust, virus-specific T cell response**  
639 Mice were either mock-infected or intraperitoneally infected with  $10^5$  PFU WT or DIP. (**A**,  
640 **B**) At 1 mo post-infection, splenocytes were harvested and examined for virus-specific  
641 CD8<sup>+</sup> T cells using the tetramers ORF6<sub>487-495</sub>/Db and ORF61<sub>524-531</sub>/Kb. (**C**) Tetramer-  
642 positive CD8<sup>+</sup> T cells were examined for KLRG1 and CD127 expression. Data for  
643 individual mice (n = 5), means, and SD were plotted. Statistical significance was analyzed  
644 by a two-tailed Student's *t*-test. (**D**) Gating strategy to determine MPEC and SLEC  
645 population frequencies using representative samples from WT- and DIP-inoculated mice.  
646

Figure S3

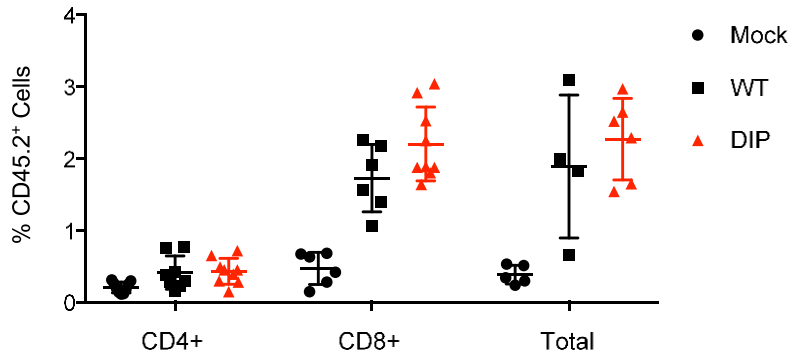

648 **Figure S3. WT- and DIP-primed T cells expand to the same extent in the recipient**  
649 **mice**

650 CD4<sup>+</sup>, CD8<sup>+</sup>, or total T cells were purified via negative selection from the spleens of mock-  
651 infected mice or mice intraperitoneally infected with 10<sup>5</sup> PFU WT or DIP. Three million  
652 purified cells were transferred to a congenic mouse by tail vein injection. At 14 d after  
653 transfer, donor cells were analyzed by flow cytometry and the percentages are shown.  
654 Data for individual mice, means, and standard deviations are plotted. Statistical  
655 significance was analyzed by a two-tailed Student's *t*-test. No statistical significance was  
656 determined for the percentages of WT- and DIP-primed donor cells.

657

Figure S4

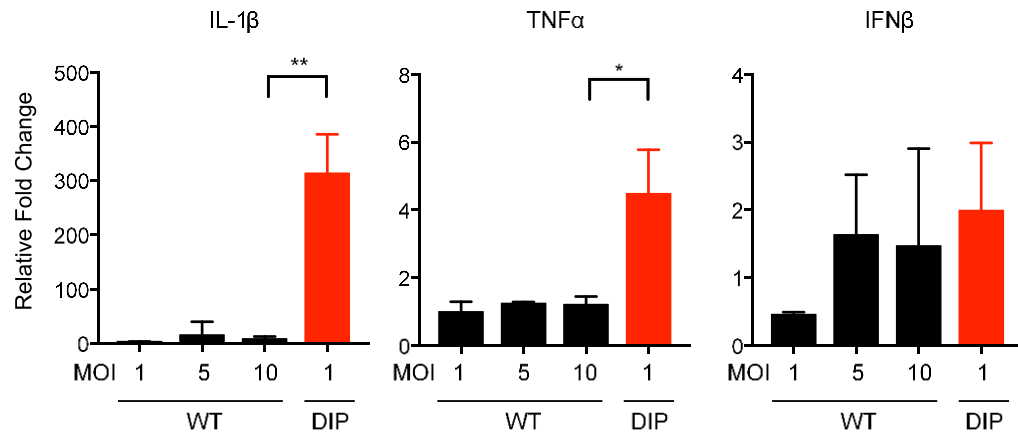



659 **Figure S4. WT does not upregulate inflammatory cytokines to the same level as DIP**  
660 Mouse BMDM were infected with WT or DIP at the MOIs indicated at the bottoms of the  
661 graphs (triplicate). (A) Total RNAs were extracted 24 h post-infection to measure IFN $\beta$ ,  
662 IL-1 $\beta$ , TNF- $\alpha$ , and  $\beta$ -actin expression. Cytokine RNA expression was normalized against  
663  $\beta$ -actin. Relative fold change was calculated by comparing to mock-infected BMDM.  
664 Statistical significance was analyzed by a two-tailed Student's *t*-test.

665 **References**

- 666 1. Epstein, M. A., Achong, B. G. & Barr, Y. M. VIRUS PARTICLES IN CULTURED  
667 LYMPHOBLASTS FROM BURKITT'S LYMPHOMA. *Lancet* **1**, 702–703 (1964).
- 668 2. zur Hausen, H. *et al.* EBV DNA in biopsies of Burkitt tumours and anaplastic carcinomas of  
669 the nasopharynx. *Nature* **228**, 1056–1058 (1970).
- 670 3. Kutok, J. L. & Wang, F. Spectrum of Epstein-Barr virus-associated diseases. *Annu Rev Pathol*  
671 **1**, 375–404 (2006).
- 672 4. Chang, Y. *et al.* Identification of herpesvirus-like DNA sequences in AIDS-associated Kaposi's  
673 sarcoma. *Science* **266**, 1865–1869 (1994).
- 674 5. Cesarman, E., Chang, Y., Moore, P. S., Said, J. W. & Knowles, D. M. Kaposi's sarcoma-  
675 associated herpesvirus-like DNA sequences in AIDS-related body-cavity-based lymphomas.  
676 *N. Engl. J. Med.* **332**, 1186–1191 (1995).
- 677 6. Soulier, J. *et al.* Kaposi's sarcoma-associated herpesvirus-like DNA sequences in multicentric  
678 Castleman's disease. *Blood* **86**, 1276–1280 (1995).
- 679 7. Plummer, M. *et al.* Global burden of cancers attributable to infections in 2012: a synthetic  
680 analysis. *The Lancet Global Health* **4**, e609–e616 (2016).
- 681 8. Thorley-Lawson, D. A. & Poodry, C. A. Identification and isolation of the main component  
682 (gp350-gp220) of Epstein-Barr virus responsible for generating neutralizing antibodies in vivo.  
683 *J. Virol.* **43**, 730–736 (1982).
- 684 9. Sokal, E. M. *et al.* Recombinant gp350 vaccine for infectious mononucleosis: a phase 2,  
685 randomized, double-blind, placebo-controlled trial to evaluate the safety, immunogenicity, and  
686 efficacy of an Epstein-Barr virus vaccine in healthy young adults. *J. Infect. Dis.* **196**, 1749–  
687 1753 (2007).
- 688 10. Johnston, C., Gottlieb, S. L. & Wald, A. Status of vaccine research and development of  
689 vaccines for herpes simplex virus. *Vaccine* **34**, 2948–2952 (2016).

- 690 11. Ivashkiv, L. B. & Donlin, L. T. Regulation of type I interferon responses. *Nature Reviews*  
691 *Immunology* **14**, 36–49 (2014).
- 692 12. McNab, F., Mayer-Barber, K., Sher, A., Wack, A. & O’Garra, A. Type I interferons in infectious  
693 disease. *Nat. Rev. Immunol.* **15**, 87–103 (2015).
- 694 13. Stark, G. R., Kerr, I. M., Williams, B. R. G., Silverman, R. H. & Schreiber, R. D. HOW CELLS  
695 RESPOND TO INTERFERONS. *Annual Review of Biochemistry* **67**, 227–264 (1998).
- 696 14. Wilson, E. B. & Brooks, D. G. Decoding the complexity of type I interferon to treat persistent  
697 viral infections. *Trends Microbiol.* **21**, 634–640 (2013).
- 698 15. Lee, H.-R., Lee, S., Chaudhary, P. M., Gill, P. & Jung, J. U. Immune evasion by Kaposi’s  
699 sarcoma-associated herpesvirus. *Future Microbiol* **5**, 1349–1365 (2010).
- 700 16. Coscoy, L. Immune evasion by Kaposi’s sarcoma-associated herpesvirus. *Nat. Rev.*  
701 *Immunol.* **7**, 391–401 (2007).
- 702 17. Virgin, H. W. *et al.* Complete sequence and genomic analysis of murine gammaherpesvirus  
703 68. *J. Virol.* **71**, 5894–5904 (1997).
- 704 18. Leang, R. S. *et al.* The Anti-interferon Activity of Conserved Viral dUTPase ORF54 is  
705 Essential for an Effective MHV-68 Infection. *PLoS Pathogens* **7**, e1002292 (2011).
- 706 19. Ishido, S., Wang, C., Lee, B. S., Cohen, G. B. & Jung, J. U. Downregulation of major  
707 histocompatibility complex class I molecules by Kaposi’s sarcoma-associated herpesvirus K3  
708 and K5 proteins. *J. Virol.* **74**, 5300–5309 (2000).
- 709 20. Stevenson, P. G. *et al.* K3-mediated evasion of CD8(+) T cells aids amplification of a latent  
710 gamma-herpesvirus. *Nat. Immunol.* **3**, 733–740 (2002).
- 711 21. Ballestas, M. E., Chatis, P. A. & Kaye, K. M. Efficient persistence of extrachromosomal KSHV  
712 DNA mediated by latency-associated nuclear antigen. *Science* **284**, 641–644 (1999).
- 713 22. Fowler, P., Marques, S., Simas, J. P. & Efsthathiou, S. ORF73 of murine herpesvirus-68 is  
714 critical for the establishment and maintenance of latency. *J. Gen. Virol.* **84**, 3405–3416 (2003).

- 715 23. Moorman, N. J., Willer, D. O. & Speck, S. H. The Gammaherpesvirus 68 Latency-Associated  
716 Nuclear Antigen Homolog Is Critical for the Establishment of Splenic Latency. *Journal of*  
717 *Virology* **77**, 10295–10303 (2003).
- 718 24. Sun, R. *et al.* A viral gene that activates lytic cycle expression of Kaposi's sarcoma-associated  
719 herpesvirus. *Proc Natl Acad Sci USA* **95**, 10866 (1998).
- 720 25. Wu, T. T., Usherwood, E. J., Stewart, J. P., Nash, A. A. & Sun, R. Rta of murine  
721 gammaherpesvirus 68 reactivates the complete lytic cycle from latency. *J. Virol.* **74**, 3659–  
722 3667 (2000).
- 723 26. Wu, T. T., Tong, L., Rickabaugh, T., Speck, S. & Sun, R. Function of Rta is essential for lytic  
724 replication of murine gammaherpesvirus 68. *J. Virol.* **75**, 9262–9273 (2001).
- 725 27. Jia, Q. *et al.* Induction of protective immunity against murine gammaherpesvirus 68 infection  
726 in the absence of viral latency. *J. Virol.* **84**, 2453–2465 (2010).
- 727 28. Coppola, M. A. *et al.* Apparent MHC-independent stimulation of CD8+ T cells in vivo during  
728 latent murine gammaherpesvirus infection. *J. Immunol.* **163**, 1481–1489 (1999).
- 729 29. Tripp, R. A. *et al.* Pathogenesis of an infectious mononucleosis-like disease induced by a  
730 murine gamma-herpesvirus: role for a viral superantigen? *J. Exp. Med.* **185**, 1641–1650  
731 (1997).
- 732 30. Usherwood, E. J., Ross, A. J., Allen, D. J. & Nash, A. A. Murine gammaherpesvirus-induced  
733 splenomegaly: a critical role for CD4 T cells. *J. Gen. Virol.* **77 ( Pt 4)**, 627–630 (1996).
- 734 31. Damania, B. & Cesarman, E. Kaposi's Sarcoma-Associated Herpesvirus. in *Fields Virology*  
735 (eds. Fields, B., Knipe, D. & Howley, P.) **2**, 2080–2128 (Wolters Kluwer Health/Lippincott  
736 Williams & Wilkins, 2013).
- 737 32. Longnecker, R., Kieff, E. & Cohen, J. Epstein-Barr virus. in *Fields Virology* (eds. Fields, B.,  
738 Knipe, D. & Howley, P.) **2**, 1898–1959 (Wolters Kluwer Health/Lippincott Williams & Wilkins,  
739 2013).

- 740 33. Joshi, N. S. *et al.* Inflammation Directs Memory Precursor and Short-Lived Effector CD8+ T  
741 Cell Fates via the Graded Expression of T-bet Transcription Factor. *Immunity* **27**, 281–295  
742 (2007).
- 743 34. Freeman, M. L. *et al.* CD4 T Cells Specific for a Latency-Associated  $\gamma$ -Herpesvirus Epitope  
744 Are Polyfunctional and Cytotoxic. *The Journal of Immunology* **193**, 5827–5834 (2014).
- 745 35. Long, H. M. *et al.* CD4+ T-cell responses to Epstein-Barr virus (EBV) latent-cycle antigens  
746 and the recognition of EBV-transformed lymphoblastoid cell lines. *J. Virol.* **79**, 4896–4907  
747 (2005).
- 748 36. Stuller, K. A. & Flano, E. CD4 T Cells Mediate Killing during Persistent Gammaherpesvirus  
749 68 Infection. *Journal of Virology* **83**, 4700–4703 (2009).
- 750 37. Sun, C. *et al.* Evasion of innate cytosolic DNA sensing by a gammaherpesvirus facilitates  
751 establishment of latent infection. *J. Immunol.* **194**, 1819–1831 (2015).
- 752 38. Trinchieri, G. Interleukin-12 and the regulation of innate resistance and adaptive immunity.  
753 *Nat. Rev. Immunol.* **3**, 133–146 (2003).
- 754 39. Siegal, F. P. *et al.* The nature of the principal type 1 interferon-producing cells in human blood.  
755 *Science* **284**, 1835–1837 (1999).
- 756 40. Obar, J. J. *et al.* T-Cell Responses to the M3 Immune Evasion Protein of Murid  
757 Gammaherpesvirus 68 Are Partially Protective and Induced with Lytic Antigen Kinetics.  
758 *Journal of Virology* **78**, 10829–10832 (2004).
- 759 41. Woodland, D. L. *et al.* Vaccination against murine gamma-herpesvirus infection. *Viral*  
760 *Immunol.* **14**, 217–226 (2001).
- 761 42. Usherwood, E. J., Ward, K. A., Blackman, M. A., Stewart, J. P. & Woodland, D. L. Latent  
762 antigen vaccination in a model gammaherpesvirus infection. *J. Virol.* **75**, 8283–8288 (2001).
- 763 43. Stewart, J. P., Micali, N., Usherwood, E. J., Bonina, L. & Nash, A. A. Murine gamma-  
764 herpesvirus 68 glycoprotein 150 protects against virus-induced mononucleosis: a model  
765 system for gamma-herpesvirus vaccination. *Vaccine* **17**, 152–157 (1999).

- 766 44. Stevenson, P. G., Belz, G. T., Castrucci, M. R., Altman, J. D. & Doherty, P. C. A  $\gamma$ -herpesvirus  
767 sneaks through a CD8<sup>+</sup> T cell response primed to a lytic-phase epitope. *Proceedings of the*  
768 *National Academy of Sciences* **96**, 9281–9286 (1999).
- 769 45. Liu, L., Usherwood, E. J., Blackman, M. A. & Woodland, D. L. T-cell vaccination alters the  
770 course of murine herpesvirus 68 infection and the establishment of viral latency in mice. *J.*  
771 *Viol.* **73**, 9849–9857 (1999).
- 772 46. Tibbetts, S. A., McClellan, J. S., Gangappa, S., Speck, S. H. & Virgin, H. W. Effective  
773 vaccination against long-term gammaherpesvirus latency. *J. Virol.* **77**, 2522–2529 (2003).
- 774 47. Fowler, P. & Efstathiou, S. Vaccine potential of a murine gammaherpesvirus-68 mutant  
775 deficient for ORF73. *J. Gen. Virol.* **85**, 609–613 (2004).
- 776 48. Rickabaugh, T. M. *et al.* Generation of a latency-deficient gammaherpesvirus that is protective  
777 against secondary infection. *J. Virol.* **78**, 9215–9223 (2004).
- 778 49. Boname, J. M., Coleman, H. M., May, J. S. & Stevenson, P. G. Protection against wild-type  
779 murine gammaherpesvirus-68 latency by a latency-deficient mutant. *J. Gen. Virol.* **85**, 131–  
780 135 (2004).
- 781 50. May, J. S., Coleman, H. M., Smillie, B., Efstathiou, S. & Stevenson, P. G. Forced lytic  
782 replication impairs host colonization by a latency-deficient mutant of murine  
783 gammaherpesvirus-68. *J. Gen. Virol.* **85**, 137–146 (2004).
- 784 51. Freeman, M. L. *et al.* Importance of antibody in virus infection and vaccine-mediated  
785 protection by a latency-deficient recombinant murine  $\gamma$ -herpesvirus-68. *J. Immunol.* **188**,  
786 1049–1056 (2012).
- 787 52. Crouse, J., Kalinke, U. & Oxenius, A. Regulation of antiviral T cell responses by type I  
788 interferons. *Nat. Rev. Immunol.* **15**, 231–242 (2015).
- 789 53. Huber, J. P. & Farrar, J. D. Regulation of effector and memory T-cell functions by type I  
790 interferon. *Immunology* **132**, 466–474 (2011).

- 791 54. Le Bon, A. *et al.* Type I interferons potently enhance humoral immunity and can promote  
792 isotype switching by stimulating dendritic cells in vivo. *Immunity* **14**, 461–470 (2001).
- 793 55. Le Bon, A. & Tough, D. F. Links between innate and adaptive immunity via type I interferon.  
794 *Current Opinion in Immunology* **14**, 432–436 (2002).
- 795 56. Aricò, E. *et al.* Humoral immune response and protection from viral infection in mice  
796 vaccinated with inactivated MHV-68: effects of type I interferon. *J. Interferon Cytokine Res.*  
797 **22**, 1081–1088 (2002).
- 798 57. Bracci, L., La Sorsa, V., Belardelli, F. & Proietti, E. Type I interferons as vaccine adjuvants  
799 against infectious diseases and cancer. *Expert Review of Vaccines* **7**, 373–381 (2008).
- 800 58. Proietti, E. *et al.* Type I IFN as a natural adjuvant for a protective immune response: lessons  
801 from the influenza vaccine model. *J. Immunol.* **169**, 375–383 (2002).
- 802 59. Santini, S. M. *et al.* Type I interferon as a powerful adjuvant for monocyte-derived dendritic  
803 cell development and activity in vitro and in Hu-PBL-SCID mice. *J. Exp. Med.* **191**, 1777–1788  
804 (2000).
- 805 60. Cull, V. S., Broomfield, S., Bartlett, E. J., Brekalo, N. L. & James, C. M. Coimmunisation with  
806 type I IFN genes enhances protective immunity against cytomegalovirus and myocarditis in  
807 gB DNA-vaccinated mice. *Gene Ther.* **9**, 1369–1378 (2002).
- 808 61. Bevan, M. J. Helping the CD8(+) T-cell response. *Nat. Rev. Immunol.* **4**, 595–602 (2004).
- 809 62. MacLeod, M. K. L., Clambey, E. T., Kappler, J. W. & Marrack, P. CD4 memory T cells: what  
810 are they and what can they do? *Semin. Immunol.* **21**, 53–61 (2009).
- 811 63. MacLeod, M. K. L., Kappler, J. W. & Marrack, P. Memory CD4 T cells: generation, reactivation  
812 and re-assignment. *Immunology* **130**, 10–15 (2010).
- 813 64. Hwang, M. L., Lukens, J. R. & Bullock, T. N. J. Cognate memory CD4+ T cells generated with  
814 dendritic cell priming influence the expansion, trafficking, and differentiation of secondary  
815 CD8+ T cells and enhance tumor control. *J. Immunol.* **179**, 5829–5838 (2007).

- 816 65. Gao, F. G. *et al.* Antigen-specific CD4<sup>+</sup> T-cell help is required to activate a memory CD8<sup>+</sup> T  
817 cell to a fully functional tumor killer cell. *Cancer Res.* **62**, 6438–6441 (2002).
- 818 66. Blachère, N. E. *et al.* IL-2 is required for the activation of memory CD8<sup>+</sup> T cells via antigen  
819 cross-presentation. *J. Immunol.* **176**, 7288–7300 (2006).
- 820 67. Fitzgerald-Bocarsly, P., Dai, J. & Singh, S. Plasmacytoid dendritic cells and type I IFN: 50  
821 years of convergent history. *Cytokine Growth Factor Rev.* **19**, 3–19 (2008).
- 822 68. Kadowaki, N., Antonenko, S., Lau, J. Y.-N. & Liu, Y.-J. Natural Interferon  $\alpha/\beta$ -Producing Cells  
823 Link Innate and Adaptive Immunity. *The Journal of Experimental Medicine* **192**, 219–226  
824 (2000).
- 825 69. McKenna, K., Beignon, A.-S. & Bhardwaj, N. Plasmacytoid dendritic cells: linking innate and  
826 adaptive immunity. *J. Virol.* **79**, 17–27 (2005).
- 827 70. Karrich, J. J., Jachimowski, L. C. M., Uittenbogaart, C. H. & Blom, B. The Plasmacytoid  
828 Dendritic Cell as the Swiss Army Knife of the Immune System: Molecular Regulation of Its  
829 Multifaceted Functions. *The Journal of Immunology* **193**, 5772–5778 (2014).
- 830 71. Obar, J. J., Fuse, S., Leung, E. K., Bellfy, S. C. & Usherwood, E. J. Gammaherpesvirus  
831 Persistence Alters Key CD8 T-Cell Memory Characteristics and Enhances Antiviral  
832 Protection. *Journal of Virology* **80**, 8303–8315 (2006).
- 833 72. Badovinac, V. P. & Harty, J. T. Manipulating the rate of memory CD8<sup>+</sup> T cell generation after  
834 acute infection. *J. Immunol.* **179**, 53–63 (2007).
- 835 73. Doherty, P. C., Christensen, J. P., Belz, G. T., Stevenson, P. G. & Sangster, M. Y. Dissecting  
836 the host response to a gamma-herpesvirus. *Philos. Trans. R. Soc. Lond., B, Biol. Sci.* **356**,  
837 581–593 (2001).
- 838 74. Barton, E., Mandal, P. & Speck, S. H. Pathogenesis and host control of gammaherpesviruses:  
839 lessons from the mouse. *Annu. Rev. Immunol.* **29**, 351–397 (2011).
- 840 75. H Speck, S. & W Virgin, H. Host and viral genetics of chronic infection: a mouse model of  
841 gamma-herpesvirus pathogenesis. *Current Opinion in Microbiology* **2**, 403–409 (1999).



- 842 76. Virgin, H. W. & Speck, S. H. Unraveling immunity to gamma-herpesviruses: a new model for  
843 understanding the role of immunity in chronic virus infection. *Curr. Opin. Immunol.* **11**, 371–  
844 379 (1999).
- 845 77. Simas, J. P. & Efstathiou, S. Murine gammaherpesvirus 68: a model for the study of  
846 gammaherpesvirus pathogenesis. *Trends Microbiol.* **6**, 276–282 (1998).
- 847 78. Nash, A. A., Dutia, B. M., Stewart, J. P. & Davison, A. J. Natural history of murine -herpesvirus  
848 infection. *Philosophical Transactions of the Royal Society B: Biological Sciences* **356**, 569–  
849 579 (2001).
- 850 79. Wu, T.-T., Blackman, M. A. & Sun, R. Prospects of a novel vaccination strategy for human  
851 gamma-herpesviruses. *Immunol. Res.* **48**, 122–146 (2010).
- 852 80. Hwang, S. *et al.* Conserved herpesviral kinase promotes viral persistence by inhibiting the  
853 IRF-3-mediated type I interferon response. *Cell Host Microbe* **5**, 166–178 (2009).
- 854
